# Supplementary material for: Distinct impact of IgG subclass on autoantibody pathogenicity in different IgG4-mediated diseases
Source: eLife. 2022 Aug 3;11:e76223. doi: 10.7554/eLife.76223 (PMC9385207; doi:10.7554/eLife.76223)
Supplement: Figure 1—source data 1. [file elife-76223-fig1-data1.xlsx]

## Sheet: Sheet1
Figure 1B
IgG1 - IgG4
Sidak's multiple comparisons test	Mean Diff.	95% CI of diff.	Significant?	Summary
Row 1	-2.158	-12.82 to 8.508	No	ns
Row 2	-0.942	-11.61 to 9.724	No	ns
Row 3	-15.56	-26.23 to -4.898	Yes	**
Row 4	-29.84	-40.50 to -19.17	Yes	****
Test details	Mean 1	Mean 2	Mean Diff.	SE of diff.	N1	N2	t	DF
IgG1 - IgG4
Row 1	39.2	41.36	-2.158	4.042	5	5	0.5339	32
Row 2	4.958	5.9	-0.942	4.042	5	5	0.2331	32
Row 3	5.32	20.88	-15.56	4.042	5	5	3.851	32
Row 4	7.536	37.37	-29.84	4.042	5	5	7.382	32
ADAMTS13 Activity
days	Ctrl hIgG					IgG1					IgG4
-1	40.63	41.96	51.8			38.5	40.24	38.7	39.63	38.92	38.43	36.25	42.35	39.2	50.55
1	41.74	61.04	45.86			10.27	10.33	-0.1	7.65	-3.36	1.95	11.65	3.9	5.33	6.67
5	47.72	49.2	42.9			-12.1	17.87	6.84	2.8	11.19	18.7	18.94	21.38	21.87	23.53
8	65.22	40.06	43.22			21.91	9.57	1.15	7.72	-2.67	30.8	41.1	35.2	42.75	37.01
