# Supplementary material for: Distinct impact of IgG subclass on autoantibody pathogenicity in different IgG4-mediated diseases
Source: eLife. 2022 Aug 3;11:e76223. doi: 10.7554/eLife.76223 (PMC9385207; doi:10.7554/eLife.76223)
Supplement: Figure 1—source data 2. [file elife-76223-fig1-data2.xlsx]

## Sheet: Sheet1
Figure 1C
day-1
IgG1 - IgG4
Sidak's multiple comparisons test	Mean Diff.	95% CI of diff.	Significant?	Summary
Row 1	0	-278.5 to 278.5	No	ns
Row 2	13.6	-264.9 to 292.1	No	ns
Row 3	23	-255.5 to 301.5	No	ns
Row 4	102.4	-176.1 to 380.9	No	ns
Row 5	-30	-308.5 to 248.5	No	ns
Row 6	63.6	-214.9 to 342.1	No	ns
Row 7	-8.2	-286.7 to 270.3	No	ns
Row 8	111	-167.5 to 389.5	No	ns
Row 9	-75	-353.5 to 203.5	No	ns
Row 10	23.2	-255.3 to 301.7	No	ns
Row 11	-36.4	-314.9 to 242.1	No	ns
Row 12	-139	-417.5 to 139.5	No	ns
Row 13	-114.4	-392.9 to 164.1	No	ns
Test details	Mean 1	Mean 2	Mean Diff.	SE of diff.	N1	N2	t	DF
Row 1	1000	1000	0	94.44	5	5	0	104
Row 2	1184	1171	13.6	94.44	5	5	0.144	104
Row 3	1488	1465	23	94.44	5	5	0.2435	104
Row 4	1792	1690	102.4	94.44	5	5	1.084	104
Row 5	1964	1994	-30	94.44	5	5	0.3176	104
Row 6	2216	2153	63.6	94.44	5	5	0.6734	104
Row 7	2376	2384	-8.2	94.44	5	5	0.08682	104
Row 8	2682	2571	111	94.44	5	5	1.175	104
Row 9	2763	2838	-75	94.44	5	5	0.7941	104
Row 10	2977	2953	23.2	94.44	5	5	0.2456	104
Row 11	3100	3136	-36.4	94.44	5	5	0.3854	104
Row 12	3123	3262	-139	94.44	5	5	1.472	104
Row 13	3319	3433	-114.4	94.44	5	5	1.211	104
day -1
Time/min	Ctrl hIgG					IgG1					IgG4
0	1000	1000	1000			1000	1000	1000	1000	1000	1000	1000	1000	1000	1000
5	1036	1216	1303			1314	1096	1148	1219	1144	1197	1277	1309	922	1148
10	1267	1424	1726			1400	1541	1374	1589	1537	1369	1617	1569	1337	1434
15	1707	1764	2004			1644	1838	1751	1890	1839	1648	1676	1771	1609	1746
20	1856	2092	2298			1865	2108	1810	2068	1968	2033	2040	2100	1948	1848
25	2110	2240	2668			2163	2381	2086	2345	2106	2147	2334	2210	2046	2026
30	2198	2370	2824			2313	2437	2321	2425	2385	2279	2444	2557	2192	2450
35	2542	2815	3240			2528	2814	2609	2788	2671	2341	2615	2628	2379	2892
40	2719	2825	3634			2697	2869	2623	2805	2822	2695	2753	3092	2548	3103
45	2910	3121	3630			2935	3058	2848	3080	2962	2820	2808	3131	2818	3190
50	3055	3142	3656			2968	3214	3079	3085	3152	2971	3044	3199	2984	3482
55	3195	3282	3945			3062	3153	3080	3105	3214	3056	3066	3321	3116	3750
60	3210	3479	4014			3353	3337	3216	3527	3161	3373	3206	3580	3159	3848
