# Supplementary material for: Distinct impact of IgG subclass on autoantibody pathogenicity in different IgG4-mediated diseases
Source: eLife. 2022 Aug 3;11:e76223. doi: 10.7554/eLife.76223 (PMC9385207; doi:10.7554/eLife.76223)
Supplement: Figure 1—source data 3. [file elife-76223-fig1-data3.xlsx]

## Sheet: Sheet1
Figure 1C
day8
IgG1 - IgG4
Source of Variation	% of total variation	P value	P value summary	Significant?
Interaction	13.69	< 0.0001	****	Yes
Time	30.56	< 0.0001	****	Yes
Column Factor	42.64	0.0003	***	Yes
Subjects (matching)	9.539	< 0.0001	****	Yes
Sidak's multiple comparisons test	Mean Diff.	95% CI of diff.	Significant?	Summary
Row 1	0	-574.8 to 574.8	No	ns
Row 2	-145	-719.8 to 429.8	No	ns
Row 3	-389.6	-964.4 to 185.2	No	ns
Row 4	-578.8	-1154 to -3.950	Yes	*
Row 5	-750.8	-1326 to -176.0	Yes	**
Row 6	-931.8	-1507 to -357.0	Yes	****
Row 7	-1061	-1636 to -486.0	Yes	****
Row 8	-1203	-1777 to -627.8	Yes	****
Row 9	-1369	-1943 to -793.8	Yes	****
Row 10	-1486	-2060 to -910.8	Yes	****
Row 11	-1617	-2192 to -1042	Yes	****
Row 12	-1643	-2218 to -1068	Yes	****
Row 13	-1754	-2329 to -1179	Yes	****
Test details	Mean 1	Mean 2	Mean Diff.	SE of diff.	N1	N2	t	DF
Row 1	1000	1000	0	194.9	5	5	0	104
Row 2	1004	1149	-145	194.9	5	5	0.7439	104
Row 3	1037	1426	-389.6	194.9	5	5	1.999	104
Row 4	1078	1657	-578.8	194.9	5	5	2.969	104
Row 5	1097	1848	-750.8	194.9	5	5	3.852	104
Row 6	1131	2062	-931.8	194.9	5	5	4.78	104
Row 7	1125	2186	-1061	194.9	5	5	5.442	104
Row 8	1219	2422	-1203	194.9	5	5	6.169	104
Row 9	1252	2620	-1369	194.9	5	5	7.021	104
Row 10	1293	2779	-1486	194.9	5	5	7.621	104
Row 11	1339	2956	-1617	194.9	5	5	8.295	104
Row 12	1407	3050	-1643	194.9	5	5	8.429	104
Row 13	1431	3185	-1754	194.9	5	5	8.997	104
Ctrl hIgG - IgG1
Source of Variation	% of total variation	P value	P value summary	Significant?
Interaction	15.12	< 0.0001	****	Yes
Time	27.18	< 0.0001	****	Yes
Column Factor	53.13	0.001	***	Yes
Subjects (matching)	8.954	< 0.0001	****	Yes
Sidak's multiple comparisons test	Mean Diff.	95% CI of diff.	Significant?	Summary
Row 1	0	-884.3 to 884.3	No	ns
Row 2	274.1	-610.2 to 1158	No	ns
Row 3	601.7	-282.6 to 1486	No	ns
Row 4	939.5	55.23 to 1824	Yes	*
Row 5	1254	370.0 to 2139	Yes	***
Row 6	1480	596.1 to 2365	Yes	****
Row 7	1661	776.5 to 2545	Yes	****
Row 8	1859	974.5 to 2743	Yes	****
Row 9	2078	1194 to 2962	Yes	****
Row 10	2195	1311 to 3079	Yes	****
Row 11	2312	1428 to 3197	Yes	****
Row 12	2317	1433 to 3201	Yes	****
Row 13	2556	1672 to 3441	Yes	****
Test details	Mean 1	Mean 2	Mean Diff.	SE of diff.	N1	N2	t	DF
Row 1	1000	1000	0	297.6	3	5	0	78
Row 2	1278	1004	274.1	297.6	3	5	0.921	78
Row 3	1638	1037	601.7	297.6	3	5	2.022	78
Row 4	2017	1078	939.5	297.6	3	5	3.157	78
Row 5	2351	1097	1254	297.6	3	5	4.215	78
Row 6	2611	1131	1480	297.6	3	5	4.975	78
Row 7	2786	1125	1661	297.6	3	5	5.581	78
Row 8	3078	1219	1859	297.6	3	5	6.246	78
Row 9	3330	1252	2078	297.6	3	5	6.982	78
Row 10	3488	1293	2195	297.6	3	5	7.376	78
Row 11	3652	1339	2312	297.6	3	5	7.77	78
Row 12	3724	1407	2317	297.6	3	5	7.786	78
Row 13	3988	1431	2556	297.6	3	5	8.59	78
Ctrl hIgG - IgG4
Source of Variation	% of total variation	P value	P value summary	Significant?
Interaction	1.81	0.0006	***	Yes
Time	81.57	< 0.0001	****	Yes
Column Factor	7.842	0.0337	*	Yes
Subjects (matching)	6.261	< 0.0001	****	Yes
Sidak's multiple comparisons test	Mean Diff.	95% CI of diff.	Significant?	Summary
Row 1	0	-676.9 to 676.9	No	ns
Row 2	129.1	-547.9 to 806.0	No	ns
Row 3	212.1	-464.8 to 889.1	No	ns
Row 4	360.7	-316.2 to 1038	No	ns
Row 5	503.5	-173.4 to 1180	No	ns
Row 6	548.6	-128.3 to 1226	No	ns
Row 7	600	-76.93 to 1277	No	ns
Row 8	656.2	-20.73 to 1333	No	ns
Row 9	709.3	32.33 to 1386	Yes	*
Row 10	709.4	32.47 to 1386	Yes	*
Row 11	695.3	18.33 to 1372	Yes	*
Row 12	673.9	-3.067 to 1351	No	ns
Row 13	802.5	125.5 to 1479	Yes	**
Test details	Mean 1	Mean 2	Mean Diff.	SE of diff.	N1	N2	t	DF
Row 1	1000	1000	0	227.8	3	5	0	78
Row 2	1278	1149	129.1	227.8	3	5	0.5666	78
Row 3	1638	1426	212.1	227.8	3	5	0.9312	78
Row 4	2017	1657	360.7	227.8	3	5	1.584	78
Row 5	2351	1848	503.5	227.8	3	5	2.21	78
Row 6	2611	2062	548.6	227.8	3	5	2.408	78
Row 7	2786	2186	600	227.8	3	5	2.634	78
Row 8	3078	2422	656.2	227.8	3	5	2.881	78
Row 9	3330	2620	709.3	227.8	3	5	3.114	78
Row 10	3488	2779	709.4	227.8	3	5	3.114	78
Row 11	3652	2956	695.3	227.8	3	5	3.052	78
Row 12	3724	3050	673.9	227.8	3	5	2.958	78
Row 13	3988	3185	802.5	227.8	3	5	3.523	78
day 8
Time/min	Ctrl hIgG					IgG1					IgG4
0	1000	1000	1000			1000	1000	1000	1000	1000	1000	1000	1000	1000	1000
5	1257	1301	1275			941	1080	714	1234	1049	1276	1090	1333	1159	885
10	1742	1549	1624			1198	1051	818	1208	908	1285	1371	1598	1473	1404
15	2199	1852	2001			1291	1234	744	1195	925	1512	1564	1810	1816	1581
20	2600	2194	2260			1413	1124	830	1376	742	1697	1720	1980	2117	1725
25	2930	2477	2426			1498	1269	874	1278	734	1755	1947	2223	2377	2010
30	3224	2576	2558			1572	1309	689	1270	786	1936	1976	2354	2576	2088
35	3597	2690	2947			1749	1279	885	1326	857	2200	2245	2496	2720	2448
40	3990	2953	3046			1881	1328	847	1427	776	2428	2562	2663	2941	2508
45	4139	3094	3231			1882	1462	909	1497	715	2501	2838	2829	3021	2704
50	4406	3217	3332			2003	1557	782	1507	848	2616	3017	3000	3315	2834
55	4444	3300	3427			2246	1488	992	1461	847	2686	3236	3046	3354	2927
60	4915	3389	3659			2206	1591	876	1607	877	2796	3381	3194	3493	3062
