# Supplementary material for: Distinct impact of IgG subclass on autoantibody pathogenicity in different IgG4-mediated diseases
Source: eLife. 2022 Aug 3;11:e76223. doi: 10.7554/eLife.76223 (PMC9385207; doi:10.7554/eLife.76223)
Supplement: Figure 1—source data 4. [file elife-76223-fig1-data4.xlsx]

## Sheet: Sheet1
Figure 1D
IgG1 - IgG4
Sidak's multiple comparisons test	Mean Diff.	95% CI of diff.	Significant?	Summary
Row 1	14.4	-15.47 to 44.27	No	ns
Row 2	-4.165	-34.04 to 25.71	No	ns
Row 3	-15.54	-45.41 to 14.33	No	ns
Row 4	-36.62	-66.49 to -6.741	Yes	*
Test details	Mean 1	Mean 2	Mean Diff.	SE of diff.	N1	N2	t	DF
Row 1	134.5	120.1	14.4	11.23	5	4	1.283	28
Row 2	23.26	27.43	-4.165	11.23	5	4	0.371	28
Row 3	23.56	39.1	-15.54	11.23	5	4	1.384	28
Row 4	51.56	88.18	-36.62	11.23	5	4	3.262	28
days	Ctrl hIgG					IgG1					IgG4
-1	133.6	141	165.8	143.1	120.2	116.8	138.8	147.2	152.9	116.8	94	127.4	119.5	139.5
1	133.4	156.8	157.1	127.7	174	10.9	23.5	24.2	27.4	30.3	28.5	31.3	25.1	24.8
5	166.8	123.1	127.5	110	122.6	14.4	33	12.1	39.7	18.6	54.9	42.9	28.7	29.9
8	147.2	159.8	137.2	132	132.8	83.5	56.2	33.5	53.2	31.4	130.5	66	74.5	81.7
