# Supplementary material for: Distinct impact of IgG subclass on autoantibody pathogenicity in different IgG4-mediated diseases
Source: eLife. 2022 Aug 3;11:e76223. doi: 10.7554/eLife.76223 (PMC9385207; doi:10.7554/eLife.76223)
Supplement: Figure 1—source data 5. [file elife-76223-fig1-data5.xlsx]

## Sheet: Sheet1
Figure 1E
day -1
IgG1 - IgG4
Sidak's multiple comparisons test	Mean Diff.	95% CI of diff.	Significant?	Summary
Row 1	0	-1500 to 1500	No	ns
Row 2	-23.3	-1524 to 1477	No	ns
Row 3	51.3	-1449 to 1552	No	ns
Row 4	137	-1363 to 1637	No	ns
Row 5	280.7	-1220 to 1781	No	ns
Row 6	234	-1266 to 1734	No	ns
Row 7	514.7	-985.6 to 2015	No	ns
Row 8	439.2	-1061 to 1939	No	ns
Row 9	385.2	-1115 to 1885	No	ns
Row 10	609.2	-891.1 to 2109	No	ns
Row 11	684.4	-815.9 to 2185	No	ns
Row 12	709.1	-791.2 to 2209	No	ns
Row 13	845.5	-654.8 to 2346	No	ns
Test details	Mean 1	Mean 2	Mean Diff.	SE of diff.	N1	N2	t	DF
Row 1	1000	1000	0	507.1	5	4	0	91
Row 2	1612	1636	-23.3	507.1	5	4	0.04595	91
Row 3	2339	2288	51.3	507.1	5	4	0.1012	91
Row 4	3051	2914	137	507.1	5	4	0.2701	91
Row 5	3821	3541	280.7	507.1	5	4	0.5535	91
Row 6	4461	4227	234	507.1	5	4	0.4615	91
Row 7	5137	4623	514.7	507.1	5	4	1.015	91
Row 8	5835	5396	439.2	507.1	5	4	0.866	91
Row 9	6444	6059	385.2	507.1	5	4	0.7596	91
Row 10	7089	6480	609.2	507.1	5	4	1.201	91
Row 11	7754	7070	684.4	507.1	5	4	1.35	91
Row 12	8354	7645	709.1	507.1	5	4	1.398	91
Row 13	9046	8201	845.5	507.1	5	4	1.667	91
day -1
Time/min	Ctrl hIgG					IgG1					IgG4
0	1000	1000	1000	1000	1000	1000	1000	1000	1000	1000	1000	1000	1000	1000
5	1698	1722	2404	1570	1586	1484	1380	1719	1770	1708	1323	1926	1522	1771
10	2388	2268	3517	2456	2096	2070	2150	2464	2715	2295	1672	2930	2265	2283
15	3162	3184	4283	3202	3059	2655	2821	3419	3635	2726	2288	3733	2757	2879
20	3935	3853	5107	4076	3530	3219	3783	4244	4249	3612	2724	4235	3302	3902
25	4635	4447	5985	4699	4117	3662	4282	5003	5167	4191	3168	4886	4120	4734
30	5350	5255	6654	5474	4778	4270	5252	5685	5982	4497	3611	5228	4581	5070
35	5992	5858	7519	6173	5415	5068	5832	6435	6730	5112	4145	5935	5332	6173
40	6488	6692	8352	6935	5939	5502	6378	6952	7579	5810	4815	6681	5982	6758
45	7170	7373	9238	7485	6437	6062	7191	7645	8091	6457	5023	7168	6363	7366
50	7798	8121	9742	8446	7073	6701	7764	8509	8806	6992	5600	7728	6981	7971
55	8431	8570	10520	8860	7441	7250	8429	9081	9489	7519	5858	8369	7624	8727
60	8958	9497	11418	9301	8328	8124	9124	9902	10092	7988	6629	9041	7995	9137
