# Supplementary material for: Distinct impact of IgG subclass on autoantibody pathogenicity in different IgG4-mediated diseases
Source: eLife. 2022 Aug 3;11:e76223. doi: 10.7554/eLife.76223 (PMC9385207; doi:10.7554/eLife.76223)
Supplement: Figure 1—source data 6. [file elife-76223-fig1-data6.xlsx]

## Sheet: Sheet1
Figure 1E
day 8
IgG1 - IgG4
Source of Variation	% of total variation	P value	P value summary	Significant?
Interaction	4.275	< 0.0001	****	Yes
Time	61.82	< 0.0001	****	Yes
Column Factor	10.52	0.0957	ns	No
Subjects (matching)	19.88	< 0.0001	****	Yes
Sidak's multiple comparisons test	Mean Diff.	95% CI of diff.	Significant?	Summary
Row 1	0	-1904 to 1904	No	ns
Row 2	-157.9	-2061 to 1746	No	ns
Row 3	-367.2	-2271 to 1536	No	ns
Row 4	-461.5	-2365 to 1442	No	ns
Row 5	-753.9	-2657 to 1150	No	ns
Row 6	-857.2	-2761 to 1046	No	ns
Row 7	-1118	-3021 to 786.0	No	ns
Row 8	-1283	-3186 to 620.8	No	ns
Row 9	-1527	-3430 to 376.7	No	ns
Row 10	-1528	-3431 to 375.7	No	ns
Row 11	-1673	-3577 to 230.2	No	ns
Row 12	-2077	-3981 to -173.6	Yes	*
Row 13	-2218	-4121 to -314.1	Yes	*
Test details	Mean 1	Mean 2	Mean Diff.	SE of diff.	N1	N2	t	DF
Row 1	1000	1000	0	643.4	5	4	0	91
Row 2	1193	1351	-157.9	643.4	5	4	0.2453	91
Row 3	1409	1776	-367.2	643.4	5	4	0.5707	91
Row 4	1729	2190	-461.5	643.4	5	4	0.7172	91
Row 5	1950	2704	-753.9	643.4	5	4	1.172	91
Row 6	2288	3145	-857.2	643.4	5	4	1.332	91
Row 7	2517	3635	-1118	643.4	5	4	1.737	91
Row 8	2785	4068	-1283	643.4	5	4	1.994	91
Row 9	3044	4571	-1527	643.4	5	4	2.373	91
Row 10	3326	4854	-1528	643.4	5	4	2.375	91
Row 11	3603	5277	-1673	643.4	5	4	2.601	91
Row 12	3754	5832	-2077	643.4	5	4	3.228	91
Row 13	3977	6194	-2218	643.4	5	4	3.447	91
Ctrl hIgG - IgG1
Source of Variation	% of total variation	P value	P value summary	Significant?
Interaction	10.89	< 0.0001	****	Yes
Time	49.77	< 0.0001	****	Yes
Column Factor	34.1	< 0.0001	****	Yes
Subjects (matching)	3.927	< 0.0001	****	Yes
Sidak's multiple comparisons test	Mean Diff.	95% CI of diff.	Significant?	Summary
Row 1	0	-1226 to 1226	No	ns
Row 2	659.2	-567.3 to 1886	No	ns
Row 3	1179	-47.26 to 2406	No	ns
Row 4	1706	479.1 to 2932	Yes	**
Row 5	2196	969.3 to 3422	Yes	****
Row 6	2722	1496 to 3949	Yes	****
Row 7	3166	1939 to 4392	Yes	****
Row 8	3600	2374 to 4827	Yes	****
Row 9	4008	2782 to 5235	Yes	****
Row 10	4367	3141 to 5594	Yes	****
Row 11	4698	3471 to 5924	Yes	****
Row 12	5183	3957 to 6410	Yes	****
Row 13	5488	4262 to 6715	Yes	****
Test details	Mean 1	Mean 2	Mean Diff.	SE of diff.	N1	N2	t	DF
Row 1	1000	1000	0	415.9	5	5	0	104
Row 2	1853	1193	659.2	415.9	5	5	1.585	104
Row 3	2588	1409	1179	415.9	5	5	2.835	104
Row 4	3434	1729	1706	415.9	5	5	4.101	104
Row 5	4145	1950	2196	415.9	5	5	5.28	104
Row 6	5010	2288	2722	415.9	5	5	6.545	104
Row 7	5683	2517	3166	415.9	5	5	7.612	104
Row 8	6385	2785	3600	415.9	5	5	8.657	104
Row 9	7053	3044	4008	415.9	5	5	9.638	104
Row 10	7694	3326	4367	415.9	5	5	10.5	104
Row 11	8301	3603	4698	415.9	5	5	11.3	104
Row 12	8938	3754	5183	415.9	5	5	12.46	104
Row 13	9465	3977	5488	415.9	5	5	13.2	104
Ctrl hIgG - IgG4
Source of Variation	% of total variation	P value	P value summary	Significant?
Interaction	3.894	< 0.0001	****	Yes
Time	70.02	< 0.0001	****	Yes
Column Factor	13.92	0.0043	**	Yes
Subjects (matching)	5.635	< 0.0001	****	Yes
Sidak's multiple comparisons test	Mean Diff.	95% CI of diff.	Significant?	Summary
Row 1	0	-1581 to 1581	No	ns
Row 2	501.4	-1080 to 2083	No	ns
Row 3	812.1	-769.3 to 2393	No	ns
Row 4	1244	-337.2 to 2825	No	ns
Row 5	1442	-139.4 to 3023	No	ns
Row 6	1865	283.7 to 3446	Yes	**
Row 7	2048	466.8 to 3629	Yes	**
Row 8	2317	736.1 to 3899	Yes	***
Row 9	2481	900.0 to 4063	Yes	***
Row 10	2840	1258 to 4421	Yes	****
Row 11	3024	1443 to 4606	Yes	****
Row 12	3106	1525 to 4687	Yes	****
Row 13	3271	1689 to 4852	Yes	****
Test details	Mean 1	Mean 2	Mean Diff.	SE of diff.	N1	N2	t	DF
Row 1	1000	1000	0	534.5	5	4	0	91
Row 2	1853	1351	501.4	534.5	5	4	0.938	91
Row 3	2588	1776	812.1	534.5	5	4	1.519	91
Row 4	3434	2190	1244	534.5	5	4	2.328	91
Row 5	4145	2704	1442	534.5	5	4	2.698	91
Row 6	5010	3145	1865	534.5	5	4	3.489	91
Row 7	5683	3635	2048	534.5	5	4	3.832	91
Row 8	6385	4068	2317	534.5	5	4	4.336	91
Row 9	7053	4571	2481	534.5	5	4	4.643	91
Row 10	7694	4854	2840	534.5	5	4	5.313	91
Row 11	8301	5277	3024	534.5	5	4	5.659	91
Row 12	8938	5832	3106	534.5	5	4	5.812	91
Row 13	9465	6194	3271	534.5	5	4	6.12	91
day 8
Time/min	Ctrl hIgG					IgG1					IgG4
0	1000	1000	1000	1000	1000	1000	1000	1000	1000	1000	1000	1000	1000	1000
5	1884	1860	1925	1771	1823	1527	1299	909	1315	917	1624	1190	1315	1276
10	2841	2743	2488	2464	2403	1804	1598	1055	1596	990	2412	1582	1509	1600
15	3837	3570	3330	3282	3153	2221	1796	1255	1916	1456	2988	1798	1991	1984
20	4429	4245	4039	4157	3857	2673	2104	1576	1935	1460	3763	2056	2464	2531
25	5468	5297	4942	4802	4541	3263	2392	1816	2426	1542	4376	2452	2823	2929
30	6044	6168	5463	5451	5287	3537	2780	1867	2624	1777	5172	2850	3141	3375
35	6711	6792	6395	6027	6001	4023	3046	2109	2872	1875	5914	3098	3457	3802
40	7465	7699	6827	6742	6530	4381	3374	2243	3121	2103	6326	3595	4106	4258
45	8082	8349	7460	7395	7182	4878	3749	2282	3390	2332	6828	3819	4242	4527
50	8664	9160	8111	7856	7713	5232	3864	2581	3869	2470	7550	4129	4537	4890
55	9359	9888	8656	8346	8439	5576	3972	2601	4038	2585	8401	4426	5094	5405
60	9867	10478	9221	8822	8937	5974	4281	2872	4085	2671	8687	4982	5348	5760
