# Supplementary material for: Distinct impact of IgG subclass on autoantibody pathogenicity in different IgG4-mediated diseases
Source: eLife. 2022 Aug 3;11:e76223. doi: 10.7554/eLife.76223 (PMC9385207; doi:10.7554/eLife.76223)
Supplement: Figure 2—source data 1. [file elife-76223-fig2-data1.xlsx]

## Sheet: Sheet1
Figure 2B
TTP1-420(IgG1):WT - TTP1-420(IgG1):FcγRα-null
Sidak's multiple comparisons test	Mean Diff.	95% CI of diff.	Significant?	Summary
Row 1	-1.008	-10.91 to 8.891	No	ns
Row 2	-6.256	-16.16 to 3.643	No	ns
Row 3	-3.47	-13.37 to 6.429	No	ns
Row 4	-20.48	-30.38 to -10.58	Yes	****
Test details	Mean 1	Mean 2	Mean Diff.	SE of diff.	N1	N2	t	DF
Row 1	55.02	56.03	-1.008	3.751	5	5	0.2687	32
Row 2	4.81	11.07	-6.256	3.751	5	5	1.668	32
Row 3	13.47	16.94	-3.47	3.751	5	5	0.925	32
Row 4	17.17	37.64	-20.48	3.751	5	5	5.458	32
days	Ctrl hIgG:WT					Ctrl hIgG:FcγRα-null					TTP1-420(IgG1):WT					TTP1-420(IgG1):FcγRα-null
-1	33.32	46.26	46.12			60.92	43.2	39.91			51.98	55.58	56.49	57.14	53.91	58.51	59.23	50.18	57.38	54.84
1	59.15	40.23	46.36			47.67	36.7	33.31			9.22	-2.01	0.59	10.02	6.23	5.57	12.93	13.82	10.67	12.34
5	50.03	54.58	41.75			61.53	49.25	47.24			19.26	10.48	13.59	14.72	9.28	6.64	17.42	31.67	18.2	10.75
8	65.34	55.01	30.64			64.28	37.97	59.74			16.87	15.69	30.21	7.67	15.4	46.9	33.89	27.84	40.99	38.6
