# Supplementary material for: Distinct impact of IgG subclass on autoantibody pathogenicity in different IgG4-mediated diseases
Source: eLife. 2022 Aug 3;11:e76223. doi: 10.7554/eLife.76223 (PMC9385207; doi:10.7554/eLife.76223)
Supplement: Figure 2—source data 2. [file elife-76223-fig2-data2.xlsx]

## Sheet: Sheet1
Figure 2C
day8
TTP1-420(IgG1):WT - TTP1-420(IgG1):FcγRα-null
Source of Variation	% of total variation	P value	P value summary	Significant?
Interaction	8.481	< 0.0001	****	Yes
Time	59.76	< 0.0001	****	Yes
Column Factor	15.37	0.0125	*	Yes
Subjects (matching)	11.98	< 0.0001	****	Yes
Sidak's multiple comparisons test	Mean Diff.	95% CI of diff.	Significant?	Summary
Row 1	0	-560.5 to 560.5	No	ns
Row 2	-31.2	-591.7 to 529.3	No	ns
Row 3	-61.2	-621.7 to 499.3	No	ns
Row 4	-177	-737.5 to 383.5	No	ns
Row 5	-238	-798.5 to 322.5	No	ns
Row 6	-413.2	-973.7 to 147.3	No	ns
Row 7	-515.4	-1076 to 45.08	No	ns
Row 8	-672	-1232 to -111.5	Yes	**
Row 9	-743.4	-1304 to -182.9	Yes	**
Row 10	-744.2	-1305 to -183.7	Yes	**
Row 11	-928	-1488 to -367.5	Yes	****
Row 12	-1120	-1680 to -559.1	Yes	****
Row 13	-1126	-1686 to -565.1	Yes	****
Test details	Mean 1	Mean 2	Mean Diff.	SE of diff.	N1	N2	t	DF
Row 1	1000	1000	0	190.1	5	5	0	104
Row 2	1059	1090	-31.2	190.1	5	5	0.1642	104
Row 3	1163	1224	-61.2	190.1	5	5	0.322	104
Row 4	1271	1448	-177	190.1	5	5	0.9313	104
Row 5	1370	1608	-238	190.1	5	5	1.252	104
Row 6	1400	1813	-413.2	190.1	5	5	2.174	104
Row 7	1514	2030	-515.4	190.1	5	5	2.712	104
Row 8	1596	2268	-672	190.1	5	5	3.536	104
Row 9	1642	2386	-743.4	190.1	5	5	3.911	104
Row 10	1814	2558	-744.2	190.1	5	5	3.916	104
Row 11	1894	2822	-928	190.1	5	5	4.883	104
Row 12	1911	3031	-1120	190.1	5	5	5.891	104
Row 13	2011	3137	-1126	190.1	5	5	5.922	104
Time/min	Ctrl hIgG:WT					Ctrl hIgG:FcγRα-null					TTP1-420(IgG1):WT					TTP1-420(IgG1):FcγRα-null
0	1000	1000	1000			1000	1000	1000			1000	1000	1000	1000	1000	1000	1000	1000	1000	1000
5	1167	1327	1029			1564	1190	1575			1112	1023	1173	1001	986	1153	1151	974	1125	1048
10	1585	1869	1304			1838	1525	1980			1093	1084	1447	1052	1139	1387	1069	1083	1303	1279
15	2012	2321	1581			2320	1774	2352			1403	1218	1411	1157	1165	1634	1372	1219	1536	1478
20	2235	2638	1909			2699	1931	2969			1493	1254	1668	1298	1136	1791	1568	1381	1641	1658
25	2695	2877	1987			2895	2333	3300			1437	1346	1767	1200	1251	2207	1748	1428	1758	1926
30	3234	3156	2111			3158	2292	3526			1580	1419	2030	1200	1342	2395	1860	1680	2158	2055
35	3614	3479	2352			3462	2737	3636			1697	1501	2079	1275	1429	2596	2159	1871	2407	2308
40	3739	3592	2360			3857	2796	4095			1759	1545	2116	1270	1521	2677	2316	1983	2478	2474
45	4040	3692	2487			4142	2834	4149			1822	1771	2429	1402	1645	3120	2416	2059	2614	2581
50	4181	4009	2575			4488	3079	4504			1935	1760	2580	1446	1749	3289	2511	2339	3080	2891
55	4557	4189	2662			4760	3111	4476			1873	1738	2816	1415	1713	3579	2886	2402	3209	3077
60	4685	4427	2775			4927	3236	4630			2021	1934	2747	1430	1925	3720	2893	2501	3369	3202
