# Supplementary material for: Distinct impact of IgG subclass on autoantibody pathogenicity in different IgG4-mediated diseases
Source: eLife. 2022 Aug 3;11:e76223. doi: 10.7554/eLife.76223 (PMC9385207; doi:10.7554/eLife.76223)
Supplement: Figure 2—source data 3. [file elife-76223-fig2-data3.xlsx]

## Sheet: Sheet1
Figure 2D
TTP1-420(IgG1):WT - TTP1-420(IgG1):Fcer1g-/-
Sidak's multiple comparisons test	Mean Diff.	95% CI of diff.	Significant?	Summary
Row 1	3.32	-7.229 to 13.87	No	ns
Row 2	-4.354	-14.90 to 6.195	No	ns
Row 3	4.786	-5.763 to 15.34	No	ns
Row 4	-35.41	-45.96 to -24.86	Yes	****
Test details	Mean 1	Mean 2	Mean Diff.	SE of diff.	N1	N2	t	DF
Row 1	55.02	51.7	3.32	3.998	5	5	0.8305	32
Row 2	4.81	9.164	-4.354	3.998	5	5	1.089	32
Row 3	13.47	8.68	4.786	3.998	5	5	1.197	32
Row 4	17.17	52.57	-35.41	3.998	5	5	8.857	32
days	Ctrl hIgG:WT					Ctrl hIgG:Fcer1g-/-					TTP1-420(IgG1):WT					TTP1-420(IgG1):Fcer1g-/-
-1	33.32	46.26	46.12			63.83	52.58	44.94			51.98	55.58	56.49	57.14	53.91	55.02	47.83	40.05	52.67	62.93
1	59.15	40.23	46.36			48.96	41.39	39.64			9.22	-2.01	0.59	10.02	6.23	8.32	14.1	5.46	7.16	10.78
5	50.03	54.58	41.75			35.79	44.8	46.47			19.26	10.48	13.59	14.72	9.28	11.84	2.07	19.31	5.05	5.13
8	65.34	55.01	30.64			64.67	25.42	58.37			16.87	15.69	30.21	7.67	15.4	37.89	54.78	60.19	53.62	56.39
