# Supplementary material for: Distinct impact of IgG subclass on autoantibody pathogenicity in different IgG4-mediated diseases
Source: eLife. 2022 Aug 3;11:e76223. doi: 10.7554/eLife.76223 (PMC9385207; doi:10.7554/eLife.76223)
Supplement: Figure 2—source data 4. [file elife-76223-fig2-data4.xlsx]

## Sheet: Sheet1
Figure 2E
day 8
TTP1-420(IgG1):WT - TTP1-420(IgG1):Fcer1g-/-
Source of Variation	% of total variation	P value	P value summary	Significant?
Interaction	11.45	< 0.0001	****	Yes
Time	43.55	< 0.0001	****	Yes
Column Factor	36.66	0.0001	***	Yes
Subjects (matching)	5.935	< 0.0001	****	Yes
Sidak's multiple comparisons test	Mean Diff.	95% CI of diff.	Significant?	Summary
Row 1	0	-597.6 to 597.6	No	ns
Row 2	-209.6	-807.2 to 388.0	No	ns
Row 3	-493.4	-1091 to 104.2	No	ns
Row 4	-685.6	-1283 to -87.96	Yes	*
Row 5	-886.4	-1484 to -288.8	Yes	***
Row 6	-1180	-1778 to -582.6	Yes	****
Row 7	-1235	-1832 to -637.2	Yes	****
Row 8	-1472	-2069 to -874.0	Yes	****
Row 9	-1766	-2364 to -1168	Yes	****
Row 10	-1681	-2278 to -1083	Yes	****
Row 11	-1912	-2510 to -1314	Yes	****
Row 12	-2035	-2633 to -1438	Yes	****
Row 13	-2064	-2661 to -1466	Yes	****
Test details	Mean 1	Mean 2	Mean Diff.	SE of diff.	N1	N2	t	DF
Row 1	1000	1000	0	202.7	5	5	0	104
Row 2	1059	1269	-209.6	202.7	5	5	1.034	104
Row 3	1163	1656	-493.4	202.7	5	5	2.435	104
Row 4	1271	1956	-685.6	202.7	5	5	3.383	104
Row 5	1370	2256	-886.4	202.7	5	5	4.374	104
Row 6	1400	2580	-1180	202.7	5	5	5.824	104
Row 7	1514	2749	-1235	202.7	5	5	6.093	104
Row 8	1596	3068	-1472	202.7	5	5	7.262	104
Row 9	1642	3408	-1766	202.7	5	5	8.714	104
Row 10	1814	3494	-1681	202.7	5	5	8.293	104
Row 11	1894	3806	-1912	202.7	5	5	9.435	104
Row 12	1911	3946	-2035	202.7	5	5	10.04	104
Row 13	2011	4075	-2064	202.7	5	5	10.18	104
Time/min	Ctrl hIgG:WT					Ctrl hIgG:Fcer1g-/-					TTP1-420(IgG1):WT					TTP1-420(IgG1):Fcer1g-/-
0	1000	1000	1000			1000	1000	1000			1000	1000	1000	1000	1000	1000	1000	1000	1000	1000
5	1167	1327	1029			1276	1181	1413			1112	1023	1173	1001	986	1338	1063	1326	1498	1118
10	1585	1869	1304			1618	1375	1908			1093	1084	1447	1052	1139	1559	1566	1770	1882	1505
15	2012	2321	1581			2090	1458	2163			1403	1218	1411	1157	1165	1741	1736	2307	2063	1935
20	2235	2638	1909			2388	1612	2530			1493	1254	1668	1298	1136	2057	2115	2548	2330	2231
25	2695	2877	1987			2916	1863	2892			1437	1346	1767	1200	1251	2162	2484	2847	2733	2676
30	3234	3156	2111			3044	2049	3268			1580	1419	2030	1200	1342	2239	2520	3163	2902	2921
35	3614	3479	2352			3475	2031	3463			1697	1501	2079	1275	1429	2649	2871	3369	3259	3191
40	3739	3592	2360			3831	2224	3784			1759	1545	2116	1270	1521	2791	3389	3818	3581	3462
45	4040	3692	2487			4173	2252	4025			1822	1771	2429	1402	1645	2813	3462	3951	3783	3463
50	4181	4009	2575			4290	2425	4151			1935	1760	2580	1446	1749	3078	3836	4268	3957	3891
55	4557	4189	2662			4452	2397	4314			1873	1738	2816	1415	1713	3252	3848	4479	4108	4044
60	4685	4427	2775			4765	2513	4496			2021	1934	2747	1430	1925	3277	4122	4504	4209	4264
