# Supplementary material for: Distinct impact of IgG subclass on autoantibody pathogenicity in different IgG4-mediated diseases
Source: eLife. 2022 Aug 3;11:e76223. doi: 10.7554/eLife.76223 (PMC9385207; doi:10.7554/eLife.76223)
Supplement: Figure 2—source data 5. [file elife-76223-fig2-data5.xlsx]

## Sheet: Sheet1
Figure 2F
N297A - GASDALIE
Sidak's multiple comparisons test	Mean Diff.	95% CI of diff.	Significant?	Summary
Row 1	3.323	-6.557 to 13.20	No	ns
Row 2	4.528	-5.352 to 14.41	No	ns
Row 3	13.71	3.828 to 23.59	Yes	**
Row 4	-0.53	-10.41 to 9.350	No	ns
Test details	Mean 1	Mean 2	Mean Diff.	SE of diff.	N1	N2	t	DF
Row 1	26.92	23.59	3.323	3.67	4	4	0.9052	24
Row 2	8.008	3.48	4.528	3.67	4	4	1.234	24
Row 3	17.78	4.068	13.71	3.67	4	4	3.735	24
Row 4	24.97	25.5	-0.53	3.67	4	4	0.1444	24
days	Ctrl hIgG					N297A					GASDALIE
-2	18.75	32.02	24.42			30.43	20.66	24.83	31.74		21.33	24.02	21.78	27.24
1	22.65	25.53	23.43			18.67	1.46	8.22	3.68		3.71	1.7	8.73	-0.22
5	11.49	25.78	23.77			19.27	14.82	17.78	19.23		0.79	6.63	8.12	0.73
8	17.05	19.75	22.04			29.5	22.06	26.51	21.8		35.06	30.53	19.46	16.94
