# Supplementary material for: Distinct impact of IgG subclass on autoantibody pathogenicity in different IgG4-mediated diseases
Source: eLife. 2022 Aug 3;11:e76223. doi: 10.7554/eLife.76223 (PMC9385207; doi:10.7554/eLife.76223)
Supplement: Figure 2—source data 6. [file elife-76223-fig2-data6.xlsx]

## Sheet: Sheet1
Figure 2G
N297A - GASDALIE
Source of Variation	% of total variation	P value	P value summary	Significant?
Interaction	15.41	< 0.0001	****	Yes
Time	38.88	< 0.0001	****	Yes
Column Factor	30.87	0.0042	**	Yes
Subjects (matching)	9.199	< 0.0001	****	Yes
Sidak's multiple comparisons test	Mean Diff.	95% CI of diff.	Significant?	Summary
Row 1	0	-307.9 to 307.9	No	ns
Row 2	-29.75	-337.7 to 278.2	No	ns
Row 3	109.8	-198.2 to 417.7	No	ns
Row 4	165	-142.9 to 472.9	No	ns
Row 5	233.8	-74.19 to 541.7	No	ns
Row 6	240	-67.94 to 547.9	No	ns
Row 7	402.5	94.56 to 710.4	Yes	**
Row 8	443.3	135.3 to 751.2	Yes	***
Row 9	495.8	187.8 to 803.7	Yes	***
Row 10	593	285.1 to 900.9	Yes	****
Row 11	577.8	269.8 to 885.7	Yes	****
Row 12	731.3	423.3 to 1039	Yes	****
Row 13	797	489.1 to 1105	Yes	****
Test details	Mean 1	Mean 2	Mean Diff.	SE of diff.	N1	N2	t	DF
Row 1	1000	1000	0	103.6	4	4	0	78
Row 2	1003	1032	-29.75	103.6	4	4	0.2871	78
Row 3	1124	1014	109.8	103.6	4	4	1.059	78
Row 4	1200	1035	165	103.6	4	4	1.592	78
Row 5	1266	1032	233.8	103.6	4	4	2.256	78
Row 6	1326	1086	240	103.6	4	4	2.316	78
Row 7	1476	1074	402.5	103.6	4	4	3.884	78
Row 8	1594	1151	443.3	103.6	4	4	4.277	78
Row 9	1635	1139	495.8	103.6	4	4	4.784	78
Row 10	1739	1146	593	103.6	4	4	5.722	78
Row 11	1776	1198	577.8	103.6	4	4	5.575	78
Row 12	1953	1222	731.3	103.6	4	4	7.057	78
Row 13	2031	1234	797	103.6	4	4	7.691	78
Ctrl hIgG - GASDALIE
Source of Variation	% of total variation	P value	P value summary	Significant?
Interaction	11.64	< 0.0001	****	Yes
Time	24.67	< 0.0001	****	Yes
Column Factor	53.97	0.0024	**	Yes
Subjects (matching)	8.479	< 0.0001	****	Yes
Sidak's multiple comparisons test	Mean Diff.	95% CI of diff.	Significant?	Summary
Row 1	0	-465.1 to 465.1	No	ns
Row 2	250.8	-214.3 to 715.8	No	ns
Row 3	354.9	-110.1 to 820.0	No	ns
Row 4	497.2	32.10 to 962.2	Yes	*
Row 5	574.9	109.9 to 1040	Yes	**
Row 6	677.6	212.5 to 1143	Yes	***
Row 7	819.9	354.9 to 1285	Yes	****
Row 8	835.7	370.6 to 1301	Yes	****
Row 9	946.3	481.3 to 1411	Yes	****
Row 10	934.2	469.1 to 1399	Yes	****
Row 11	920.7	455.6 to 1386	Yes	****
Row 12	1099	633.5 to 1564	Yes	****
Row 13	1016	551.4 to 1481	Yes	****
Test details	Mean 1	Mean 2	Mean Diff.	SE of diff.	N1	N2	t	DF
Row 1	1000	1000	0	155.5	3	4	0	65
Row 2	1283	1032	250.8	155.5	3	4	1.612	65
Row 3	1369	1014	354.9	155.5	3	4	2.282	65
Row 4	1532	1035	497.2	155.5	3	4	3.196	65
Row 5	1607	1032	574.9	155.5	3	4	3.696	65
Row 6	1763	1086	677.6	155.5	3	4	4.356	65
Row 7	1894	1074	819.9	155.5	3	4	5.271	65
Row 8	1987	1151	835.7	155.5	3	4	5.373	65
Row 9	2085	1139	946.3	155.5	3	4	6.084	65
Row 10	2080	1146	934.2	155.5	3	4	6.006	65
Row 11	2119	1198	920.7	155.5	3	4	5.919	65
Row 12	2320	1222	1099	155.5	3	4	7.063	65
Row 13	2251	1234	1016	155.5	3	4	6.535	65
Ctrl hIgG - N297A
Source of Variation	% of total variation	P value	P value summary	Significant?
Interaction	1.795	0.1319	ns	No
Time	71.09	< 0.0001	****	Yes
Column Factor	14.18	0.0261	*	Yes
Subjects (matching)	7.268	< 0.0001	****	Yes
Sidak's multiple comparisons test	Mean Diff.	95% CI of diff.	Significant?	Summary
Row 1	0	-411.3 to 411.3	No	ns
Row 2	280.5	-130.8 to 691.8	No	ns
Row 3	245.2	-166.2 to 656.5	No	ns
Row 4	332.2	-79.17 to 743.5	No	ns
Row 5	341.2	-70.17 to 752.5	No	ns
Row 6	437.6	26.25 to 848.9	Yes	*
Row 7	417.4	6.079 to 828.8	Yes	*
Row 8	392.4	-18.92 to 803.8	No	ns
Row 9	450.6	39.25 to 861.9	Yes	*
Row 10	341.2	-70.17 to 752.5	No	ns
Row 11	342.9	-68.42 to 754.3	No	ns
Row 12	367.3	-44.00 to 778.7	No	ns
Row 13	219.4	-191.9 to 630.8	No	ns
Test details	Mean 1	Mean 2	Mean Diff.	SE of diff.	N1	N2	t	DF
Row 1	1000	1000	0	137.6	3	4	0	65
Row 2	1283	1003	280.5	137.6	3	4	2.039	65
Row 3	1369	1124	245.2	137.6	3	4	1.782	65
Row 4	1532	1200	332.2	137.6	3	4	2.414	65
Row 5	1607	1266	341.2	137.6	3	4	2.48	65
Row 6	1763	1326	437.6	137.6	3	4	3.181	65
Row 7	1894	1476	417.4	137.6	3	4	3.034	65
Row 8	1987	1594	392.4	137.6	3	4	2.852	65
Row 9	2085	1635	450.6	137.6	3	4	3.275	65
Row 10	2080	1739	341.2	137.6	3	4	2.48	65
Row 11	2119	1776	342.9	137.6	3	4	2.493	65
Row 12	2320	1953	367.3	137.6	3	4	2.67	65
Row 13	2251	2031	219.4	137.6	3	4	1.595	65
Time/min	Ctrl hIgG				N297A				GASDALIE
0	1000	1000	1000		1000	1000	1000	1000	1000	1000	1000	1000
5	1265	1315	1269		1032	1103	1041	834	982	1110	1090	947
10	1320	1421	1365		1087	1233	1192	982	912	1084	1037	1022
15	1508	1544	1543		1286	1348	1295	869	1022	970	1205	941
20	1521	1717	1582		1315	1327	1351	1069	1060	1086	1113	868
25	1574	1818	1898		1226	1376	1475	1226	1019	1170	1281	873
30	1769	1919	1993		1622	1474	1519	1290	1059	1066	1201	969
35	1794	2174	1992		1749	1481	1600	1547	1021	1141	1426	1016
40	1722	2305	2229		1624	1687	1748	1480	1092	1252	1370	842
45	1752	2379	2108		1823	1673	1795	1663	1015	1338	1285	944
50	1636	2408	2312		1849	1686	1855	1713	1015	1368	1406	1003
55	1996	2557	2408		2086	1918	1949	1859	1079	1414	1418	976
60	1697	2544	2511		2077	1966	2095	1987	963	1329	1562	1083
