# Supplementary material for: Distinct impact of IgG subclass on autoantibody pathogenicity in different IgG4-mediated diseases
Source: eLife. 2022 Aug 3;11:e76223. doi: 10.7554/eLife.76223 (PMC9385207; doi:10.7554/eLife.76223)
Supplement: Figure 2—source data 7. [file elife-76223-fig2-data7.xlsx]

## Sheet: Sheet1
Figure 2H
Tukey's multiple comparisons test	Mean Diff.	95.00% CI of diff.	Significant?	Summary	Adjusted P Value
Row 1
Ctrl hIgG vs. IgG1	-15.36	-95.46 to 64.74	No	ns	0.8227
Ctrl hIgG vs. GASDALIE	-6.14	-86.73 to 74.45	No	ns	0.971
IgG1 vs. GASDALIE	9.22	-37.58 to 56.02	No	ns	0.84
Row 2
Ctrl hIgG vs. IgG1	122.4	92.59 to 152.1	Yes	****	<0.0001
Ctrl hIgG vs. GASDALIE	136	105.5 to 166.5	Yes	***	0.0002
IgG1 vs. GASDALIE	13.66	1.124 to 26.19	Yes	*	0.0368
Row 3
Ctrl hIgG vs. IgG1	114.7	95.89 to 133.6	Yes	****	<0.0001
Ctrl hIgG vs. GASDALIE	137.8	123.1 to 152.5	Yes	****	<0.0001
IgG1 vs. GASDALIE	23.08	5.235 to 40.93	Yes	*	0.0166
Row 4
Ctrl hIgG vs. IgG1	35.64	-1.432 to 72.71	No	ns	0.0588
Ctrl hIgG vs. GASDALIE	60.26	-19.07 to 139.6	No	ns	0.1218
IgG1 vs. GASDALIE	24.62	-54.75 to 104.0	No	ns	0.6095
Test details	Mean 1	Mean 2	Mean Diff.	SE of diff.	N1	N2	q	DF
Row 1
Ctrl hIgG vs. IgG1	149.1	164.5	-15.36	25.34	5	5	0.8571	5.447
Ctrl hIgG vs. GASDALIE	149.1	155.3	-6.14	26.5	5	5	0.3277	6.188
IgG1 vs. GASDALIE	164.5	155.3	9.22	16.2	5	5	0.8049	7.605
Row 2
Ctrl hIgG vs. IgG1	149	26.62	122.4	9.372	5	5	18.46	5.368
Ctrl hIgG vs. GASDALIE	149	12.96	136	8.737	5	5	22.01	4.178
IgG1 vs. GASDALIE	26.62	12.96	13.66	3.851	5	5	5.016	4.996
Row 3
Ctrl hIgG vs. IgG1	158.5	43.7	114.7	6.527	5	5	24.86	7.601
Ctrl hIgG vs. GASDALIE	158.5	20.62	137.8	5.063	5	5	38.5	7.413
IgG1 vs. GASDALIE	43.7	20.62	23.08	5.949	5	5	5.488	6.505
Row 4
Ctrl hIgG vs. IgG1	137.6	102	35.64	12.97	5	5	3.886	7.989
Ctrl hIgG vs. GASDALIE	137.6	77.34	60.26	24.84	5	5	3.43	5.281
IgG1 vs. GASDALIE	102	77.34	24.62	24.72	5	5	1.408	5.195
days	Ctrl hIgG					IgG1					GASDALIE
-1	94.28	127.03	193.39	214.64	116.37	188.75	152.95	144.57	189.11	147.13	143.07	124.33	149.6	200.8	158.61
1	152.01	135.25	176.8	154.07	126.71	17.86	26.34	33.36	36.08	19.44	13.23	8.53	16.13	14.69	12.21
5	157.37	164.53	170.12	147.36	152.87	58.07	51.97	32.83	43.36	32.28	26.88	22.63	15.34	26.49	11.75
8	173.38	132.45	126.12	135.83	120.21	112.38	67.66	101.62	109.47	118.66	30.91	18.49	141.73	97.54	98.03
