# Supplementary material for: Distinct impact of IgG subclass on autoantibody pathogenicity in different IgG4-mediated diseases
Source: eLife. 2022 Aug 3;11:e76223. doi: 10.7554/eLife.76223 (PMC9385207; doi:10.7554/eLife.76223)
Supplement: Figure 2—source data 8. [file elife-76223-fig2-data8.xlsx]

## Sheet: Sheet1
Figure 2I
IgG1-GASDALIE
Two-way RM ANOVA	Matching: Stacked
Assume sphericity?	Yes
Alpha	0.05
Source of Variation	% of total variation	P value	P value summary	Significant?
Time x Column Factor	7.465	<0.0001	****	Yes
Time	57.67	<0.0001	****	Yes
Column Factor	19.36	0.0054	**	Yes
Subject	10.87	<0.0001	****	Yes
Sidak's multiple comparisons test	Mean Diff.	95.00% CI of diff.	Significant?	Summary
Row 1	0	-651.1 to 651.1	No	ns
Row 2	83.2	-567.9 to 734.3	No	ns
Row 3	197.6	-453.5 to 848.7	No	ns
Row 4	403.8	-247.3 to 1055	No	ns
Row 5	455.6	-195.5 to 1107	No	ns
Row 6	629.2	-21.94 to 1280	No	ns
Row 7	719.6	68.46 to 1371	Yes	*
Row 8	825.6	174.5 to 1477	Yes	**
Row 9	966.2	315.1 to 1617	Yes	***
Row 10	987.8	336.7 to 1639	Yes	***
Row 11	1130	479.1 to 1781	Yes	****
Row 12	1309	658.1 to 1960	Yes	****
Row 13	1363	712.1 to 2014	Yes	****
Test details	Mean 1	Mean 2	Mean Diff.	SE of diff.	N1	N2	t	DF
Row 1	1000	1000	0	220.8	5	5	0	104
Row 2	1212	1129	83.2	220.8	5	5	0.3768	104
Row 3	1434	1236	197.6	220.8	5	5	0.8949	104
Row 4	1719	1315	403.8	220.8	5	5	1.829	104
Row 5	1927	1471	455.6	220.8	5	5	2.063	104
Row 6	2163	1534	629.2	220.8	5	5	2.85	104
Row 7	2411	1692	719.6	220.8	5	5	3.259	104
Row 8	2593	1767	825.6	220.8	5	5	3.739	104
Row 9	2797	1831	966.2	220.8	5	5	4.376	104
Row 10	2978	1990	987.8	220.8	5	5	4.474	104
Row 11	3167	2037	1130	220.8	5	5	5.119	104
Row 12	3431	2122	1309	220.8	5	5	5.929	104
Row 13	3632	2269	1363	220.8	5	5	6.174	104
Ctrl hIgG-IgG1
Two-way RM ANOVA	Matching: Stacked
Assume sphericity?	Yes
Alpha	0.05
Source of Variation	% of total variation	P value	P value summary	Significant?
Row Factor x Column Factor	13.93	<0.0001	****	Yes
Row Factor	43.16	<0.0001	****	Yes
Column Factor	41.33	<0.0001	****	Yes
Subject	1.141	<0.0001	****	Yes
Sidak's multiple comparisons test	Mean Diff.	95.00% CI of diff.	Significant?	Summary	Adjusted P Value
Row 1	0	-754.1 to 754.1	No	ns	>0.9999
Row 2	731.2	-22.88 to 1485	No	ns	0.0646
Row 3	1381	626.5 to 2135	Yes	****	<0.0001
Row 4	2014	1260 to 2768	Yes	****	<0.0001
Row 5	2706	1952 to 3460	Yes	****	<0.0001
Row 6	3283	2529 to 4037	Yes	****	<0.0001
Row 7	3799	3045 to 4553	Yes	****	<0.0001
Row 8	4456	3702 to 5210	Yes	****	<0.0001
Row 9	5029	4275 to 5783	Yes	****	<0.0001
Row 10	5515	4761 to 6269	Yes	****	<0.0001
Row 11	5978	5224 to 6732	Yes	****	<0.0001
Row 12	6397	5643 to 7151	Yes	****	<0.0001
Row 13	6895	6141 to 7649	Yes	****	<0.0001
Test details	Mean 1	Mean 2	Mean Diff.	SE of diff.	N1	N2	t	DF
Row 1	1000	1000	0	255.7	5	5	0	104
Row 2	1943	1212	731.2	255.7	5	5	2.86	104
Row 3	2814	1434	1381	255.7	5	5	5.399	104
Row 4	3733	1719	2014	255.7	5	5	7.875	104
Row 5	4633	1927	2706	255.7	5	5	10.58	104
Row 6	5446	2163	3283	255.7	5	5	12.84	104
Row 7	6211	2411	3799	255.7	5	5	14.86	104
Row 8	7049	2593	4456	255.7	5	5	17.43	104
Row 9	7826	2797	5029	255.7	5	5	19.67	104
Row 10	8493	2978	5515	255.7	5	5	21.57	104
Row 11	9145	3167	5978	255.7	5	5	23.38	104
Row 12	9828	3431	6397	255.7	5	5	25.02	104
Row 13	10528	3632	6895	255.7	5	5	26.97	104
Ctrl hIgG-GASDALIE
Two-way RM ANOVA	Matching: Across row
Assume sphericity?	Yes
Alpha	0.05
Source of Variation	% of total variation	P value	P value summary	Significant?
Row Factor x Column Factor	17.73	<0.0001	****	Yes
Row Factor	29.89	<0.0001	****	Yes
Column Factor	51.5	<0.0001	****	Yes
Subject	0.3141	0.9826	ns	No
Sidak's multiple comparisons test	Mean Diff.	95.00% CI of diff.	Significant?	Summary	Adjusted P Value
Row 1	0	-698.0 to 698.0	No	ns	>0.9999
Row 2	814.4	116.4 to 1512	Yes	*	0.0117
Row 3	1578	880.2 to 2276	Yes	****	<0.0001
Row 4	2417	1719 to 3115	Yes	****	<0.0001
Row 5	3161	2463 to 3859	Yes	****	<0.0001
Row 6	3912	3214 to 4610	Yes	****	<0.0001
Row 7	4519	3821 to 5217	Yes	****	<0.0001
Row 8	5282	4584 to 5980	Yes	****	<0.0001
Row 9	5995	5297 to 6693	Yes	****	<0.0001
Row 10	6503	5805 to 7201	Yes	****	<0.0001
Row 11	7109	6411 to 7807	Yes	****	<0.0001
Row 12	7707	7009 to 8405	Yes	****	<0.0001
Row 13	8259	7561 to 8957	Yes	****	<0.0001
Test details	Mean 1	Mean 2	Mean Diff.	SE of diff.	N1	N2	t	DF
Row 1	1000	1000	0	231.3	5	5	0	52
Row 2	1943	1129	814.4	231.3	5	5	3.521	52
Row 3	2814	1236	1578	231.3	5	5	6.823	52
Row 4	3733	1315	2417	231.3	5	5	10.45	52
Row 5	4633	1471	3161	231.3	5	5	13.67	52
Row 6	5446	1534	3912	231.3	5	5	16.91	52
Row 7	6211	1692	4519	231.3	5	5	19.54	52
Row 8	7049	1767	5282	231.3	5	5	22.83	52
Row 9	7826	1831	5995	231.3	5	5	25.92	52
Row 10	8493	1990	6503	231.3	5	5	28.12	52
Row 11	9145	2037	7109	231.3	5	5	30.73	52
Row 12	9828	2122	7707	231.3	5	5	33.32	52
Row 13	10528	2269	8259	231.3	5	5	35.7	52
Time/min	Ctrl hIgG					IgG1					GASDALIE
0	1000	1000	1000	1000	1000	1000	1000	1000	1000	1000	1000	1000	1000	1000	1000
5	2102	1789	2052	1765	2007	1176	1236	1229	1318	1100	1185	1090	1079	1171	1118
10	2793	2742	3147	2666	2723	1654	1368	1373	1565	1208	1326	1106	1287	1272	1189
15	3799	3680	4122	3454	3608	1991	1798	1451	1899	1456	1554	1281	1287	1436	1018
20	4726	4651	4908	4222	4656	2241	2081	1707	1953	1652	1655	1278	1449	1625	1349
25	5502	5641	5761	5093	5234	2630	2078	1928	2316	1863	1775	1575	1325	1663	1331
30	6124	6265	6750	5674	6240	2928	2621	2004	2513	1991	1874	1582	1649	1870	1484
35	7033	7204	7520	6473	7016	3227	2722	2220	2767	2029	1962	1770	1664	1920	1521
40	7690	8000	8589	7317	7536	3419	3090	2392	2814	2272	2082	1786	1608	2112	1568
45	8458	8707	9200	7738	8364	3693	3291	2467	2942	2497	2403	1939	1825	2228	1556
50	9176	9391	9843	8513	8804	3880	3376	2703	3309	2567	2295	2014	1900	2335	1640
55	9803	10126	10580	9208	9424	4306	3825	2842	3421	2760	2522	2109	1847	2558	1572
60	10623	10683	11172	9845	10316	4372	4196	2964	3778	2852	2718	2447	1899	2552	1730
