# Supplementary material for: Distinct impact of IgG subclass on autoantibody pathogenicity in different IgG4-mediated diseases
Source: eLife. 2022 Aug 3;11:e76223. doi: 10.7554/eLife.76223 (PMC9385207; doi:10.7554/eLife.76223)
Supplement: Figure 3—source data 1. [file elife-76223-fig3-data1.xlsx]

## Sheet: Sheet1
Figure 3A
Mann Whitney test
P value	< 0.0001
Exact or approximate P value?	Exact
P value summary	****
Significantly different? (P < 0.05)	Yes
One- or two-tailed P value?	Two-tailed
Sum of ranks in column A,B	314.0 , 1964
Mann-Whitney U	38
Difference between medians
Median of column A	0.295
Median of column B	0.9025
Difference: Actual	0.6075
Difference: Hodges-Lehmann	0.543
HC	TTP
0.217	0.925
0.242	0.765
0.497	1.127
0.44	1.17
0.342	0.739
0.311	0.747
0.353	1.113
0.245	0.972
0.257	0.437
0.251	0.77
0.394	0.977
0.428	0.88
0.29	1.02
0.336	1.185
0.228	1.026
0.202	0.602
0.213	1.259
0.267	0.652
0.402	0.603
0.423	0.566
0.236	0.944
0.295	0.781
0.405	0.666
	1.009
	0.842
	0.499
	0.355
	1.126
	0.932
	1.02
	0.97
	0.693
	0.732
	0.332
	0.3
	1.05
	0.578
	0.957
	0.988
	1.171
	0.466
	0.387
	0.975
	1.177
