# Supplementary material for: Distinct impact of IgG subclass on autoantibody pathogenicity in different IgG4-mediated diseases
Source: eLife. 2022 Aug 3;11:e76223. doi: 10.7554/eLife.76223 (PMC9385207; doi:10.7554/eLife.76223)
Supplement: Figure 3—source data 2. [file elife-76223-fig3-data2.xlsx]

## Sheet: Sheet1
Figure 3B
Mann Whitney test
P value	< 0.0001
Exact or approximate P value?	Exact
P value summary	****
Significantly different? (P < 0.05)	Yes
One- or two-tailed P value?	Two-tailed
Sum of ranks in column A,B	1219 , 861.0
Mann-Whitney U	0
Difference between medians
Median of column A	82.18
Median of column B	1.263
Difference: Actual	-80.92
Difference: Hodges-Lehmann	-80.92
HC	TTP
67.864	1.29
63.651	1.48
70.241	1.234
51.856	1.596
66.567	1.511
82.178	1.375
105.342	1.356
62.058	1.426
71.935	1.791
95.066	1.584
85.809	1.162
89.581	1.301
85.203	1.67
75.663	1.466
90.922	1.235
75.143	1.428
84.847	1.781
69.429	1.241
91.062	1.764
88.071	1.474
84.47	1.113
84.676	1.249
80.061	2.674
	1.24
	0.907
	1.056
	1.371
	0.948
	1.024
	1.263
	0.808
	1.023
	0.595
	2.269
	0.877
	0.891
	1.057
	0.962
	0.829
	0.83
	2.501
