# Supplementary material for: Distinct impact of IgG subclass on autoantibody pathogenicity in different IgG4-mediated diseases
Source: eLife. 2022 Aug 3;11:e76223. doi: 10.7554/eLife.76223 (PMC9385207; doi:10.7554/eLife.76223)
Supplement: Figure 3—source data 3. [file elife-76223-fig3-data3.xlsx]

## Sheet: Sheet1
Figure 3C
Mann Whitney test
P value	< 0.0001
Exact or approximate P value?	Exact
P value summary	****
Significantly different? (P < 0.05)	Yes
One- or two-tailed P value?	Two-tailed
Sum of ranks in column A,B	1288 , 990.0
Mann-Whitney U	0
Difference between medians
Median of column A	497.2
Median of column B	11.9
Difference: Actual	-485.4
Difference: Hodges-Lehmann	-479
HC	TTP
457.292	8.014
332.913	-0.011
306.332	1.42
388.583	12.013
492.231	9.05
524.496	10.702
658.403	2.009
357.488	2.932
431.881	33.806
595.378	18.693
609.588	0.678
539.04	24.504
497.246	12.113
391.759	101.572
525.666	9.09
518.31	14.059
539.876	1.347
443.416	3.38
585.348	178.372
548.068	47.106
526.836	2.27
497.246	1.815
442.413	99.291
	4.142
	22.926
	37.778
	64.378
	33.07
	4.643
	1.066
	11.779
	25.674
	29.058
	44.986
	4.209
	6.89
	28.148
	41.937
	33.846
	1.989
	138.123
	100.642
	3.065
	1.012
