# Supplementary material for: Distinct impact of IgG subclass on autoantibody pathogenicity in different IgG4-mediated diseases
Source: eLife. 2022 Aug 3;11:e76223. doi: 10.7554/eLife.76223 (PMC9385207; doi:10.7554/eLife.76223)
Supplement: Figure 3—source data 4. [file elife-76223-fig3-data4.xlsx]

## Sheet: Sheet1
Figure 3D
Best-fit values
Slope	45.38 ± 12.14
Y-intercept when X=0.0	-32.95 ± 17.01
X-intercept when Y=0.0	0.7262
1/slope	0.02204
95% Confidence Intervals
Slope	20.82 to 69.94
Y-intercept when X=0.0	-67.37 to 1.463
X-intercept when Y=0.0	-0.06660 to 1.016
Goodness of Fit
R square	0.2638
Sy.x	33.61
Is slope significantly non-zero?
F	13.97
DFn, DFd	1.000, 39.00
P value	0.0006
Deviation from zero?	Significant
Data
Number of X values	41
Maximum number of Y replicates	1
Total number of values	41
Number of missing values	0
Ac	Ag
1.29	8.014
1.48	-0.011
1.234	1.42
1.596	12.013
1.511	9.05
1.375	10.702
1.356	2.009
1.426	2.932
1.791	33.806
1.584	18.693
1.162	0.678
1.301	24.504
1.67	12.113
1.466	101.572
1.235	9.09
1.428	14.059
1.781	1.347
1.241	3.38
1.764	178.372
1.474	47.106
1.113	2.27
1.249	1.815
2.674	99.291
1.24	4.142
0.907	22.926
1.056	37.778
1.371	64.378
0.948	33.07
1.024	4.643
1.263	1.066
0.808	11.779
1.023	25.674
0.595	29.058
2.269	44.986
0.877	4.209
0.891	6.89
1.057	28.148
0.962	41.937
0.829	33.846
0.83	1.989
2.501	138.123
Equation	Y = 45.38*X - 32.95
