# Supplementary material for: Distinct impact of IgG subclass on autoantibody pathogenicity in different IgG4-mediated diseases
Source: eLife. 2022 Aug 3;11:e76223. doi: 10.7554/eLife.76223 (PMC9385207; doi:10.7554/eLife.76223)
Supplement: Figure 3—source data 5. [file elife-76223-fig3-data5.xlsx]

## Sheet: Sheet1
Figure 3E
IgG1
	Mann Whitney test
	P value	< 0.0001
	Exact or approximate P value?	Exact
	P value summary	****
	Significantly different? (P < 0.05)	Yes
	One- or two-tailed P value?	Two-tailed
	Sum of ranks in column A,B	350.0 , 1928
	Mann-Whitney U	74
	Difference between medians
	Median of column A	0.423
	Median of column B	2.276
	Difference: Actual	1.853
	Difference: Hodges-Lehmann	1.65
IgG1	HC	TTP
	0.337	2.244
	0.497	1.756
	0.329	2.74
	0.835	2.658
	0.596	0.653
	1.153	1.843
	0.956	2.703
	0.324	2.391
	0.488	0.598
	0.442	2.125
	0.335	2.802
	0.897	2.412
	0.383	2.172
	0.382	2.73
	0.358	2.57
	0.29	1.109
	0.365	3.073
	1.472	2
	0.294	1.656
	0.771	1.28
	0.423	2.307
	0.408	2.486
	0.749	1.716
		2.739
		2.574
		1.291
		0.22
		2.843
		1.828
		2.938
		2.561
		1.623
		2.07
		0.598
		0.44
		2.775
		1.432
		2.567
		2.549
		2.803
		0.723
		0.744
		2.619
		3.021
