# Supplementary material for: Distinct impact of IgG subclass on autoantibody pathogenicity in different IgG4-mediated diseases
Source: eLife. 2022 Aug 3;11:e76223. doi: 10.7554/eLife.76223 (PMC9385207; doi:10.7554/eLife.76223)
Supplement: Figure 3—source data 7. [file elife-76223-fig3-data7.xlsx]

## Sheet: Sheet1
Figure 3F
Best-fit values
Slope	-0.5132 ± 0.1562
Y-intercept when X=0.0	2.320 ± 0.3397
X-intercept when Y=0.0	4.522
1/slope	-1.949
95% Confidence Intervals
Slope	-0.8286 to -0.1978
Y-intercept when X=0.0	1.635 to 3.006
X-intercept when Y=0.0	3.493 to 8.584
Goodness of Fit
R square	0.2044
Sy.x	0.8281
Is slope significantly non-zero?
F	10.79
DFn, DFd	1.000, 42.00
P value	0.0021
Deviation from zero?	Significant
Data
Number of X values	44
Maximum number of Y replicates	1
Total number of values	44
Number of missing values	0
Equation	Y = -0.5132*X + 2.320
IgG1	IgG4
2.244	0.825
1.756	0.209
2.74	0.104
2.658	0.11
0.653	2.972
1.843	1.88
2.703	0.117
2.391	0.186
0.598	1.785
2.125	0.144
2.802	0.25
2.412	2.073
2.172	0.654
2.73	1.229
2.57	1.778
1.109	2.965
3.073	0.239
2	0.217
1.656	1.083
1.28	1.57
2.307	2.041
2.486	0.815
1.716	2.194
2.739	1.964
2.574	1.933
1.291	1.262
0.22	2.781
2.843	2.405
1.828	1.93
2.938	0.662
2.561	1.319
1.623	0.833
2.07	2.209
0.598	0.381
0.44	2.347
2.775	0.163
1.432	0.47
2.567	1.799
2.549	0.89
2.803	0.492
0.723	1.958
0.744	2.352
2.619	2.608
3.021	0.237
