# Supplementary material for: Distinct impact of IgG subclass on autoantibody pathogenicity in different IgG4-mediated diseases
Source: eLife. 2022 Aug 3;11:e76223. doi: 10.7554/eLife.76223 (PMC9385207; doi:10.7554/eLife.76223)
Supplement: Figure 3—source data 8. [file elife-76223-fig3-data8.xlsx]

## Sheet: Sheet1
Figure 3G
Best-fit values
Slope	-0.2018 ± 0.08237
Y-intercept when X=0.0	1.740 ± 0.1780
X-intercept when Y=0.0	8.62
1/slope	-4.956
95% Confidence Intervals
Slope	-0.3684 to -0.03515
Y-intercept when X=0.0	1.379 to 2.100
X-intercept when Y=0.0	5.594 to 39.98
Goodness of Fit
R square	0.1334
Sy.x	0.4127
Is slope significantly non-zero?
F	6.002
DFn, DFd	1.000, 39.00
P value	0.0189
Deviation from zero?	Significant
Data
Number of X values	41
Maximum number of Y replicates	1
Total number of values	41
Number of missing values	0
Equation	Y = -0.2018*X + 1.740
IgG1	Ac
2.244	1.29
1.756	1.48
2.74	1.234
2.658	1.596
0.653	1.511
1.843	1.375
2.703	1.356
2.391	1.426
0.598	1.791
2.125	1.584
2.802	1.162
2.412	1.301
2.172	1.67
2.73	1.466
2.57	1.235
1.109	1.428
3.073	1.781
2	1.241
1.656	1.764
1.28	1.474
2.307	1.113
2.486	1.249
1.716	2.674
2.739	1.24
2.574	0.907
1.291	1.056
0.22	1.371
2.843	0.948
1.828	1.024
2.938	1.263
2.561	0.808
1.623	1.023
2.07	0.595
0.598	2.269
0.44	0.877
2.775	0.891
1.432	1.057
2.567	0.962
2.549	0.829
2.803	0.83
0.723	2.501
