# Supplementary material for: Distinct impact of IgG subclass on autoantibody pathogenicity in different IgG4-mediated diseases
Source: eLife. 2022 Aug 3;11:e76223. doi: 10.7554/eLife.76223 (PMC9385207; doi:10.7554/eLife.76223)
Supplement: Figure 3—source data 9. [file elife-76223-fig3-data9.xlsx]

## Sheet: Sheet1
Figure 3H
Best-fit values
Slope	-19.52 ± 6.875
Y-intercept when X=0.0	67.50 ± 14.95
X-intercept when Y=0.0	3.459
1/slope	-0.05124
95% Confidence Intervals
Slope	-33.40 to -5.635
Y-intercept when X=0.0	37.32 to 97.69
X-intercept when Y=0.0	2.709 to 7.150
Goodness of Fit
R square	0.161
Sy.x	36.44
Is slope significantly non-zero?
F	8.057
DFn, DFd	1.000, 42.00
P value	0.007
Deviation from zero?	Significant
Data
Number of X values	44
Maximum number of Y replicates	1
Total number of values	44
Number of missing values	0
Equation	Y = -19.52*X + 67.50
IgG1	Ag
2.244	8.014
1.756	-0.011
2.74	1.42
2.658	12.013
0.653	9.05
1.843	10.702
2.703	2.009
2.391	2.932
0.598	33.806
2.125	18.693
2.802	0.678
2.412	24.504
2.172	12.113
2.73	101.572
2.57	9.09
1.109	14.059
3.073	1.347
2	3.38
1.656	178.372
1.28	47.106
2.307	2.27
2.486	1.815
1.716	99.291
2.739	4.142
2.574	22.926
1.291	37.778
0.22	64.378
2.843	33.07
1.828	4.643
2.938	1.066
2.561	11.779
1.623	25.674
2.07	29.058
0.598	44.986
0.44	4.209
2.775	6.89
1.432	28.148
2.567	41.937
2.549	33.846
2.803	1.989
0.723	138.123
0.744	100.642
2.619	3.065
3.021	1.012
