# Supplementary material for: Distinct impact of IgG subclass on autoantibody pathogenicity in different IgG4-mediated diseases
Source: eLife. 2022 Aug 3;11:e76223. doi: 10.7554/eLife.76223 (PMC9385207; doi:10.7554/eLife.76223)
Supplement: Figure 3—source data 10. [file elife-76223-fig3-data10.xlsx]

## Sheet: Sheet1
Figure 3I
Best-fit values
Slope	-0.009720 ± 0.07816
Y-intercept when X=0.0	1.345 ± 0.1197
X-intercept when Y=0.0	138.4
1/slope	-102.9
95% Confidence Intervals
Slope	-0.1678 to 0.1484
Y-intercept when X=0.0	1.103 to 1.587
X-intercept when Y=0.0	9.145 to +infinity
Goodness of Fit
R square	0.0003964
Sy.x	0.4432
Is slope significantly non-zero?
F	0.01547
DFn, DFd	1.000, 39.00
P value	0.9017
Deviation from zero?	Not Significant
Data
Number of X values	41
Maximum number of Y replicates	1
Total number of values	41
Number of missing values	0
Equation	Y = -0.009720*X + 1.345
IgG4	Ac
0.825	1.29
0.209	1.48
0.104	1.234
0.11	1.596
2.972	1.511
1.88	1.375
0.117	1.356
0.186	1.426
1.785	1.791
0.144	1.584
0.25	1.162
2.073	1.301
0.654	1.67
1.229	1.466
1.778	1.235
2.965	1.428
0.239	1.781
0.217	1.241
1.083	1.764
1.57	1.474
2.041	1.113
0.815	1.249
2.194	2.674
1.964	1.24
1.933	0.907
1.262	1.056
2.781	1.371
2.405	0.948
1.93	1.024
0.662	1.263
1.319	0.808
0.833	1.023
2.209	0.595
0.381	2.269
2.347	0.877
0.163	0.891
0.47	1.057
1.799	0.962
0.89	0.829
0.492	0.83
1.958	2.501
