# Supplementary material for: Distinct impact of IgG subclass on autoantibody pathogenicity in different IgG4-mediated diseases
Source: eLife. 2022 Aug 3;11:e76223. doi: 10.7554/eLife.76223 (PMC9385207; doi:10.7554/eLife.76223)
Supplement: Figure 3—source data 11. [file elife-76223-fig3-data11.xlsx]

## Sheet: Sheet1
Figure 3J
Best-fit values
Slope	11.14 ± 6.385
Y-intercept when X=0.0	13.75 ± 10.03
X-intercept when Y=0.0	-1.234
1/slope	0.08978
95% Confidence Intervals
Slope	-1.752 to 24.03
Y-intercept when X=0.0	-6.500 to 34.00
X-intercept when Y=0.0	-infinity to 0.3071
Goodness of Fit
R square	0.06757
Sy.x	38.41
Is slope significantly non-zero?
F	3.043
DFn, DFd	1.000, 42.00
P value	0.0884
Deviation from zero?	Not Significant
Data
Number of X values	44
Maximum number of Y replicates	1
Total number of values	44
Number of missing values	0
Equation	Y = 11.14*X + 13.75
IgG4	Ag
0.825	8.014
0.209	-0.011
0.104	1.42
0.11	12.013
2.972	9.05
1.88	10.702
0.117	2.009
0.186	2.932
1.785	33.806
0.144	18.693
0.25	0.678
2.073	24.504
0.654	12.113
1.229	101.572
1.778	9.09
2.965	14.059
0.239	1.347
0.217	3.38
1.083	178.372
1.57	47.106
2.041	2.27
0.815	1.815
2.194	99.291
1.964	4.142
1.933	22.926
1.262	37.778
2.781	64.378
2.405	33.07
1.93	4.643
0.662	1.066
1.319	11.779
0.833	25.674
2.209	29.058
0.381	44.986
2.347	4.209
0.163	6.89
0.47	28.148
1.799	41.937
0.89	33.846
0.492	1.989
1.958	138.123
2.352	100.642
2.608	3.065
0.237	1.012
