# Supplementary material for: Distinct impact of IgG subclass on autoantibody pathogenicity in different IgG4-mediated diseases
Source: eLife. 2022 Aug 3;11:e76223. doi: 10.7554/eLife.76223 (PMC9385207; doi:10.7554/eLife.76223)
Supplement: Figure 3—source data 12. [file elife-76223-fig3-data12.xlsx]

## Sheet: Sheet1
Figure 3K	IgG1 Dominant																									IgG4 Dominant
IgG1	12.901	11.041	12.024	13.773	23.749	21.632	14.488	5.521	6.915	4.957	14.507	3.985	18.621	8.99	12.65	7.998	5.749	6.114	2.939	9.202						3.526	12.862	9.349	9.308	3.636	9.418	1.032	15.644	6.974	2.552	6.445	4.311	4.255	2.524	10.255	5.267	3.844	1.033	1.278	1.32	2.102	0.728	1.139	0.3
IgG4	0.193	0.23	0.266	0.552	1.051	1.039	1.128	0.433	0.7	0.903	2.877	0.85	4.12	5.722	8.196	5.205	4.06	5.271	2.72	8.962						5.326	19.65	15.161	15.588	7.084	18.765	2.066	38.765	23.1	8.466	21.989	17.43	18.709	11.718	53.407	28.473	27.794	15.31	19.463	35.65	92.099	35.335	185.193	95.618
