# Supplementary material for: Distinct impact of IgG subclass on autoantibody pathogenicity in different IgG4-mediated diseases
Source: eLife. 2022 Aug 3;11:e76223. doi: 10.7554/eLife.76223 (PMC9385207; doi:10.7554/eLife.76223)
Supplement: Figure 3—source data 13. [file elife-76223-fig3-data13.xlsx]

## Sheet: Sheet1
Figure 3L
Mann Whitney test
P value	0.8385
Exact or approximate P value?	Exact
P value summary	ns
Significantly different? (P < 0.05)	No
One- or two-tailed P value?	Two-tailed
Sum of ranks in column A,B	391.0 , 470.0
Mann-Whitney U	201
Difference between medians
Median of column A	1.263
Median of column B	1.271
Difference: Actual	0.0075
Difference: Hodges-Lehmann	0.0175
IgG1	IgG4
1.234	1.023
1.596	1.24
1.356	1.235
0.891	0.962
1.781	1.764
	0.907
1.162	2.269
1.584	0.948
1.426	1.301
1.241	1.056
0.83	1.113
1.48	1.375
1.263	1.024
0.829	1.474
1.466
1.249	0.595
1.67	2.674
1.29	1.791
1.057	2.501
0.808
	1.428
	0.877
	1.511
	1.371
