# Supplementary material for: Distinct impact of IgG subclass on autoantibody pathogenicity in different IgG4-mediated diseases
Source: eLife. 2022 Aug 3;11:e76223. doi: 10.7554/eLife.76223 (PMC9385207; doi:10.7554/eLife.76223)
Supplement: Figure 3—source data 14. [file elife-76223-fig3-data14.xlsx]

## Sheet: Sheet1
Figure 3M
Mann Whitney test
P value	0.0004
Exact or approximate P value?	Exact
P value summary	***
Significantly different? (P < 0.05)	Yes
One- or two-tailed P value?	Two-tailed
Sum of ranks in column A,B	305.0 , 685.0
Mann-Whitney U	95
Difference between medians
Median of column A	3.156
Median of column B	27.37
Difference: Actual	24.21
Difference: Hodges-Lehmann	20.46
IgG1	IgG4
1.42	25.674
12.013	4.142
2.009	9.09
6.89	41.937
1.347	178.372
1.012	22.926
0.678	44.986
18.693	33.07
2.932	24.504
3.38	37.778
1.989	2.27
-0.011	10.702
1.066	4.643
33.846	47.106
101.572	3.065
1.815	29.058
12.113	99.291
8.014	33.806
28.148	138.123
11.779	100.642
	14.059
	4.209
	9.05
	64.378
