# Supplementary material for: Distinct impact of IgG subclass on autoantibody pathogenicity in different IgG4-mediated diseases
Source: eLife. 2022 Aug 3;11:e76223. doi: 10.7554/eLife.76223 (PMC9385207; doi:10.7554/eLife.76223)
Supplement: Figure 4—source data 1. [file elife-76223-fig4-data1.xlsx]

## Sheet: Sheet1
Figure 4A
Dunn's multiple comparisons test	Mean rank diff.	Significant?	Summary
IgG vs. IgG1	82.68	Yes	****
IgG vs. IgG4	26.45	Yes	**
IgG1 vs. IgG4	-56.23	Yes	****
Test details	Mean rank 1	Mean rank 2	Mean rank diff.	n1	n2
IgG vs. IgG1	116.4	33.7	82.68	53	53
IgG vs. IgG4	116.4	89.92	26.45	53	53
IgG1 vs. IgG4	33.7	89.92	-56.23	53	53
IgG	IgG1	IgG4
1767	109	1140
2029	188	615
1281	37	1103
1096	46	937
2830	148	1338
1108	31	817
1104	27	804
1452	148	45
1547	77	1167
430	9	538
1139	151	35
763	109	253
543	22	706
723	22	658
695	68	475
668	8	944
1203	51	678
1209	103	32
559	7	724
1573	29	1060
1163	124	502
526	57	5
284	41	0
335	46	19
609	6	670
692	73	221
602	64	93
918	20	770
791	53	647
1158	11	1283
1430	49	1220
1031	57	742
739	8	857
533	56	8
691	2	752
509	10	500
670	76	125
687	24	295
1065	71	492
1357	23	1046
411	42	45
457	18	511
951	116	184
368	9	376
647	53	133
723	40	525
521	12	635
260	14	120
485	25	178
648	4	825
303	3	324
1008	58	780
529	71	33
