# Supplementary material for: Distinct impact of IgG subclass on autoantibody pathogenicity in different IgG4-mediated diseases
Source: eLife. 2022 Aug 3;11:e76223. doi: 10.7554/eLife.76223 (PMC9385207; doi:10.7554/eLife.76223)
Supplement: Figure 4—source data 2. [file elife-76223-fig4-data2.xlsx]

## Sheet: Sheet1
Figure 4B
PF1
	IgG1	IgG4
Dsg1	0.9397	1.472
Dsg2	0.0663	0.0435
EC1	0.1789	0.6905
EC1-2	0.4077	1.2534
EC1-3	0.7641	1.4919
EC1-4	0.6836	1.3896
EC2-5	1.2722	1.4385
EC3-5	0.071	0.0451
EC4-5	0.0783	0.0475
EC5	0.0738	0.0503
1%BSA	0.0552	0.0418
TBS-Ca	0.0596	0.044
