# Supplementary material for: Distinct impact of IgG subclass on autoantibody pathogenicity in different IgG4-mediated diseases
Source: eLife. 2022 Aug 3;11:e76223. doi: 10.7554/eLife.76223 (PMC9385207; doi:10.7554/eLife.76223)
Supplement: Figure 4—source data 3. [file elife-76223-fig4-data3.xlsx]

## Sheet: Sheet1
Figure 4B
PF2
	IgG1	IgG4
Dsg1	0.6212	1.3284
Dsg2	0.0564	0.0443
EC1	0.0753	0.1161
EC1-2	0.1587	0.4146
EC1-3	0.3851	1.1809
EC1-4	0.679	1.3225
EC2-5	0.3836	1.2419
EC3-5	0.4521	1.2714
EC4-5	0.0689	0.0457
EC5	0.0666	0.049
1%BSA	0.0511	0.0433
TBS-Ca	0.0549	0.0432
