# Supplementary material for: Distinct impact of IgG subclass on autoantibody pathogenicity in different IgG4-mediated diseases
Source: eLife. 2022 Aug 3;11:e76223. doi: 10.7554/eLife.76223 (PMC9385207; doi:10.7554/eLife.76223)
Supplement: Figure 4—source data 4. [file elife-76223-fig4-data4.xlsx]

## Sheet: Sheet1
Figure 4C
Two-way ANOVA	Ordinary
Alpha	0.05
Source of Variation	% of total variation	P value	P value summary	Significant?
Interaction	20.09	0.0276	*	Yes
Row Factor	24	0.0157	*	Yes
Column Factor	9.272	0.0592	ns	No
Sidak's multiple comparisons test	Mean Diff.	95% CI of diff.	Significant?	Summary
Ctrl hIgG:hFCGR-Tg vs. Ctrl hIgG:FcγRα-null	0	-3.314 to 3.314	No	ns
Ctrl hIgG:hFCGR-Tg vs. IgG1:hFCGR-Tg	0	-3.100 to 3.100	No	ns
Ctrl hIgG:hFCGR-Tg vs. IgG1:FcγRα-null	-3	-5.964 to -0.03585	Yes	*
Ctrl hIgG:hFCGR-Tg vs. IgG4:hFCGR-Tg	-2	-4.964 to 0.9641	No	ns
Ctrl hIgG:hFCGR-Tg vs. IgG4:FcγRα-null	-2	-4.964 to 0.9641	No	ns
Ctrl hIgG:FcγRα-null vs. IgG1:hFCGR-Tg	0	-3.100 to 3.100	No	ns
Ctrl hIgG:FcγRα-null vs. IgG1:FcγRα-null	-3	-5.964 to -0.03585	Yes	*
Ctrl hIgG:FcγRα-null vs. IgG4:hFCGR-Tg	-2	-4.964 to 0.9641	No	ns
Ctrl hIgG:FcγRα-null vs. IgG4:FcγRα-null	-2	-4.964 to 0.9641	No	ns
IgG1:hFCGR-Tg vs. IgG1:FcγRα-null	-3	-5.723 to -0.2773	Yes	*
IgG1:hFCGR-Tg vs. IgG4:hFCGR-Tg	-2	-4.723 to 0.7227	No	ns
IgG1:hFCGR-Tg vs. IgG4:FcγRα-null	-2	-4.723 to 0.7227	No	ns
IgG1:FcγRα-null vs. IgG4:hFCGR-Tg	1	-1.567 to 3.567	No	ns
IgG1:FcγRα-null vs. IgG4:FcγRα-null	1	-1.567 to 3.567	No	ns
IgG4:hFCGR-Tg vs. IgG4:FcγRα-null	0	-2.567 to 2.567	No	ns
Test details	Mean 1	Mean 2	Mean Diff.	SE of diff.	N1	N2	t	DF
Ctrl hIgG:hFCGR-Tg vs. Ctrl hIgG:FcγRα-null	0	0	0	0.9912	3	3	0	19
Ctrl hIgG:hFCGR-Tg vs. IgG1:hFCGR-Tg	0	0	0	0.9272	3	4	0	19
Ctrl hIgG:hFCGR-Tg vs. IgG1:FcγRα-null	0	3	-3	0.8865	3	5	3.384	19
Ctrl hIgG:hFCGR-Tg vs. IgG4:hFCGR-Tg	0	2	-2	0.8865	3	5	2.256	19
Ctrl hIgG:hFCGR-Tg vs. IgG4:FcγRα-null	0	2	-2	0.8865	3	5	2.256	19
Ctrl hIgG:FcγRα-null vs. IgG1:hFCGR-Tg	0	0	0	0.9272	3	4	0	19
Ctrl hIgG:FcγRα-null vs. IgG1:FcγRα-null	0	3	-3	0.8865	3	5	3.384	19
Ctrl hIgG:FcγRα-null vs. IgG4:hFCGR-Tg	0	2	-2	0.8865	3	5	2.256	19
Ctrl hIgG:FcγRα-null vs. IgG4:FcγRα-null	0	2	-2	0.8865	3	5	2.256	19
IgG1:hFCGR-Tg vs. IgG1:FcγRα-null	0	3	-3	0.8143	4	5	3.684	19
IgG1:hFCGR-Tg vs. IgG4:hFCGR-Tg	0	2	-2	0.8143	4	5	2.456	19
IgG1:hFCGR-Tg vs. IgG4:FcγRα-null	0	2	-2	0.8143	4	5	2.456	19
IgG1:FcγRα-null vs. IgG4:hFCGR-Tg	3	2	1	0.7678	5	5	1.302	19
IgG1:FcγRα-null vs. IgG4:FcγRα-null	3	2	1	0.7678	5	5	1.302	19
IgG4:hFCGR-Tg vs. IgG4:FcγRα-null	2	2	0	0.7678	5	5	0	19
	hFCGR-Tg					FcγRα-null
Ctrl hIgG	0	0	0			0	0	0
IgG1	0	0	0	0		4	3	0	4	4
IgG4	3	0	3	2	2	0	3	1	2	4
