# Supplementary material for: Distinct impact of IgG subclass on autoantibody pathogenicity in different IgG4-mediated diseases
Source: eLife. 2022 Aug 3;11:e76223. doi: 10.7554/eLife.76223 (PMC9385207; doi:10.7554/eLife.76223)
Supplement: Figure 4—source data 5. [file elife-76223-fig4-data5.xlsx]

## Sheet: Sheet1
Figure 4E
Sidak's multiple comparisons test	Mean Diff.	95% CI of diff.	Significant?	Summary
Ctrl :hFCGR-Tg vs. Ctrl :FcγRα-null	-0.3867	-10.08 to 9.310	No	ns
Ctrl :hFCGR-Tg vs. IgG1:hFCGR-Tg	-0.5392	-9.609 to 8.531	No	ns
Ctrl :hFCGR-Tg vs. IgG1:FcγRα-null	-18.81	-27.48 to -10.13	Yes	****
Ctrl :hFCGR-Tg vs. IgG4:hFCGR-Tg	-1.555	-10.23 to 7.118	No	ns
Ctrl :hFCGR-Tg vs. IgG4:FcγRα-null	-12.34	-21.02 to -3.672	Yes	**
Ctrl :FcγRα-null vs. IgG1:hFCGR-Tg	-0.1525	-9.223 to 8.918	No	ns
Ctrl :FcγRα-null vs. IgG1:FcγRα-null	-18.42	-27.09 to -9.747	Yes	****
Ctrl :FcγRα-null vs. IgG4:hFCGR-Tg	-1.168	-9.841 to 7.505	No	ns
Ctrl :FcγRα-null vs. IgG4:FcγRα-null	-11.96	-20.63 to -3.285	Yes	**
IgG1:hFCGR-Tg vs. IgG1:FcγRα-null	-18.27	-26.23 to -10.30	Yes	****
IgG1:hFCGR-Tg vs. IgG4:hFCGR-Tg	-1.016	-8.982 to 6.951	No	ns
IgG1:hFCGR-Tg vs. IgG4:FcγRα-null	-11.81	-19.77 to -3.839	Yes	**
IgG1:FcγRα-null vs. IgG4:hFCGR-Tg	17.25	9.741 to 24.76	Yes	****
IgG1:FcγRα-null vs. IgG4:FcγRα-null	6.462	-1.049 to 13.97	No	ns
IgG4:hFCGR-Tg vs. IgG4:FcγRα-null	-10.79	-18.30 to -3.279	Yes	**
Test details	Mean 1	Mean 2	Mean Diff.	SE of diff.	N1	N2	t	DF
Ctrl :hFCGR-Tg vs. Ctrl :FcγRα-null	0.8533	1.24	-0.3867	2.9	3	3	0.1333	19
Ctrl :hFCGR-Tg vs. IgG1:hFCGR-Tg	0.8533	1.393	-0.5392	2.713	3	4	0.1987	19
Ctrl :hFCGR-Tg vs. IgG1:FcγRα-null	0.8533	19.66	-18.81	2.594	3	5	7.25	19
Ctrl :hFCGR-Tg vs. IgG4:hFCGR-Tg	0.8533	2.408	-1.555	2.594	3	5	0.5993	19
Ctrl :hFCGR-Tg vs. IgG4:FcγRα-null	0.8533	13.2	-12.34	2.594	3	5	4.759	19
Ctrl :FcγRα-null vs. IgG1:hFCGR-Tg	1.24	1.393	-0.1525	2.713	3	4	0.05621	19
Ctrl :FcγRα-null vs. IgG1:FcγRα-null	1.24	19.66	-18.42	2.594	3	5	7.101	19
Ctrl :FcγRα-null vs. IgG4:hFCGR-Tg	1.24	2.408	-1.168	2.594	3	5	0.4503	19
Ctrl :FcγRα-null vs. IgG4:FcγRα-null	1.24	13.2	-11.96	2.594	3	5	4.61	19
IgG1:hFCGR-Tg vs. IgG1:FcγRα-null	1.393	19.66	-18.27	2.383	4	5	7.667	19
IgG1:hFCGR-Tg vs. IgG4:hFCGR-Tg	1.393	2.408	-1.016	2.383	4	5	0.4262	19
IgG1:hFCGR-Tg vs. IgG4:FcγRα-null	1.393	13.2	-11.81	2.383	4	5	4.955	19
IgG1:FcγRα-null vs. IgG4:hFCGR-Tg	19.66	2.408	17.25	2.246	5	5	7.68	19
IgG1:FcγRα-null vs. IgG4:FcγRα-null	19.66	13.2	6.462	2.246	5	5	2.877	19
IgG4:hFCGR-Tg vs. IgG4:FcγRα-null	2.408	13.2	-10.79	2.246	5	5	4.803	19
	hFCGR-Tg					FcγRα-null
Ctrl	1.07	0.65	0.84			1.1	1.66	0.96
IgG1	2.13	1.23	1.26	0.95		9.2	24.8	18.5	20.1	25.7
IgG4	1.19	0.61	7.76	1.18	1.3	9.79	14.2	14.1	16.6	11.3
