# Supplementary material for: Distinct impact of IgG subclass on autoantibody pathogenicity in different IgG4-mediated diseases
Source: eLife. 2022 Aug 3;11:e76223. doi: 10.7554/eLife.76223 (PMC9385207; doi:10.7554/eLife.76223)
Supplement: Figure 4—source data 6. [file elife-76223-fig4-data6.xlsx]

## Sheet: Sheet1
Figure 4F
Sidak's multiple comparisons test	Mean Diff.	95% CI of diff.	Significant?	Summary
Ctrl :hFCGR-Tg vs. Ctrl :FcγRα-null	-829.7	-23819 to 22160	No	ns
Ctrl :hFCGR-Tg vs. IgG1:hFCGR-Tg	-143.2	-21648 to 21362	No	ns
Ctrl :hFCGR-Tg vs. IgG1:FcγRα-null	-37492	-58054 to -16929	Yes	***
Ctrl :hFCGR-Tg vs. IgG4:hFCGR-Tg	-2564	-23127 to 17998	No	ns
Ctrl :hFCGR-Tg vs. IgG4:FcγRα-null	-21088	-41651 to -525.7	Yes	*
Ctrl :FcγRα-null vs. IgG1:hFCGR-Tg	686.5	-20818 to 22191	No	ns
Ctrl :FcγRα-null vs. IgG1:FcγRα-null	-36662	-57225 to -16100	Yes	***
Ctrl :FcγRα-null vs. IgG4:hFCGR-Tg	-1735	-22297 to 18828	No	ns
Ctrl :FcγRα-null vs. IgG4:FcγRα-null	-20259	-40821 to 303.9	No	ns
IgG1:hFCGR-Tg vs. IgG1:FcγRα-null	-37349	-56237 to -18461	Yes	****
IgG1:hFCGR-Tg vs. IgG4:hFCGR-Tg	-2421	-21309 to 16467	No	ns
IgG1:hFCGR-Tg vs. IgG4:FcγRα-null	-20945	-39833 to -2057	Yes	*
IgG1:FcγRα-null vs. IgG4:hFCGR-Tg	34928	17120 to 52735	Yes	****
IgG1:FcγRα-null vs. IgG4:FcγRα-null	16404	-1404 to 34211	No	ns
IgG4:hFCGR-Tg vs. IgG4:FcγRα-null	-18524	-36332 to -716.3	Yes	*
Test details	Mean 1	Mean 2	Mean Diff.	SE of diff.	N1	N2	t	DF
Ctrl :hFCGR-Tg vs. Ctrl :FcγRα-null	1176	2006	-829.7	6876	3	3	0.1207	19
Ctrl :hFCGR-Tg vs. IgG1:hFCGR-Tg	1176	1320	-143.2	6432	3	4	0.02226	19
Ctrl :hFCGR-Tg vs. IgG1:FcγRα-null	1176	38668	-37492	6150	3	5	6.096	19
Ctrl :hFCGR-Tg vs. IgG4:hFCGR-Tg	1176	3741	-2564	6150	3	5	0.417	19
Ctrl :hFCGR-Tg vs. IgG4:FcγRα-null	1176	22265	-21088	6150	3	5	3.429	19
Ctrl :FcγRα-null vs. IgG1:hFCGR-Tg	2006	1320	686.5	6432	3	4	0.1067	19
Ctrl :FcγRα-null vs. IgG1:FcγRα-null	2006	38668	-36662	6150	3	5	5.961	19
Ctrl :FcγRα-null vs. IgG4:hFCGR-Tg	2006	3741	-1735	6150	3	5	0.282	19
Ctrl :FcγRα-null vs. IgG4:FcγRα-null	2006	22265	-20259	6150	3	5	3.294	19
IgG1:hFCGR-Tg vs. IgG1:FcγRα-null	1320	38668	-37349	5649	4	5	6.611	19
IgG1:hFCGR-Tg vs. IgG4:hFCGR-Tg	1320	3741	-2421	5649	4	5	0.4286	19
IgG1:hFCGR-Tg vs. IgG4:FcγRα-null	1320	22265	-20945	5649	4	5	3.708	19
IgG1:FcγRα-null vs. IgG4:hFCGR-Tg	38668	3741	34928	5326	5	5	6.558	19
IgG1:FcγRα-null vs. IgG4:FcγRα-null	38668	22265	16404	5326	5	5	3.08	19
IgG4:hFCGR-Tg vs. IgG4:FcγRα-null	3741	22265	-18524	5326	5	5	3.478	19
	hFCGR-Tg					FcγRα-null
Ctrl	1293	1033	1203			1760	2615	1643
IgG1	2190	910	1172	1006		14681	43330	35732	36753	62845
IgG4	1648	1270	12111	2320	1354	23935	21576	20672	27938	17202
