# Supplementary material for: Distinct impact of IgG subclass on autoantibody pathogenicity in different IgG4-mediated diseases
Source: eLife. 2022 Aug 3;11:e76223. doi: 10.7554/eLife.76223 (PMC9385207; doi:10.7554/eLife.76223)
Supplement: Figure 5—source data 1. [file elife-76223-fig5-data1.xlsx]

## Sheet: Sheet1
Figure 5A
Tukey's multiple comparisons test	Mean Diff.	95% CI of diff.	Significant?	Summary
Ctrl hIgG vs. N297A	-2.2	-4.795 to 0.3948	No	ns
Ctrl hIgG vs. GASDALIE	0	-2.595 to 2.595	No	ns
N297A vs. GASDALIE	2.2	-0.04719 to 4.447	No	ns
Test details	Mean 1	Mean 2	Mean Diff.	SE of diff.	n1	n2	q	DF
Ctrl hIgG vs. N297A	0	2.2	-2.2	0.9466	3	5	3.287	10
Ctrl hIgG vs. GASDALIE	0	0	0	0.9466	3	5	0	10
N297A vs. GASDALIE	2.2	0	2.2	0.8198	5	5	3.795	10
Ctrl hIgG	N297A	GASDALIE
0	4	0
0	0	0
0	0	0
	4	0
	3	0
