# Supplementary material for: Distinct impact of IgG subclass on autoantibody pathogenicity in different IgG4-mediated diseases
Source: eLife. 2022 Aug 3;11:e76223. doi: 10.7554/eLife.76223 (PMC9385207; doi:10.7554/eLife.76223)
Supplement: Figure 5—source data 2. [file elife-76223-fig5-data2.xlsx]

## Sheet: Sheet1
Figure 5B
Tukey's multiple comparisons test	Mean Diff.	95% CI of diff.	Significant?	Summary
Ctrl hIgG vs. N297A	-0.278	-0.4798 to -0.07625	Yes	**
Ctrl hIgG vs. GASDALIE	-0.188	-0.3898 to 0.01375	No	ns
N297A vs. GASDALIE	0.09	-0.08472 to 0.2647	No	ns
Test details	Mean 1	Mean 2	Mean Diff.	SE of diff.	n1	n2	q	DF
Ctrl hIgG vs. N297A	0.42	0.698	-0.278	0.0736	3	5	5.342	10
Ctrl hIgG vs. GASDALIE	0.42	0.608	-0.188	0.0736	3	5	3.613	10
N297A vs. GASDALIE	0.698	0.608	0.09	0.06374	5	5	1.997	10
Ctrl hIgG	N297A	GASDALIE
0.36	0.61	0.5
0.45	0.83	0.57
0.45	0.71	0.73
	0.81	0.65
	0.53	0.59
