# Supplementary material for: Distinct impact of IgG subclass on autoantibody pathogenicity in different IgG4-mediated diseases
Source: eLife. 2022 Aug 3;11:e76223. doi: 10.7554/eLife.76223 (PMC9385207; doi:10.7554/eLife.76223)
Supplement: Figure 5—source data 3. [file elife-76223-fig5-data3.xlsx]

## Sheet: Sheet1
Figure 5C
Tukey's multiple comparisons test	Mean Diff.	95% CI of diff.	Significant?	Summary
Ctrl hIgG vs. N297A	-0.02933	-0.05001 to -0.008657	Yes	**
Ctrl hIgG vs. GASDALIE	-0.005333	-0.02601 to 0.01534	No	ns
N297A vs. GASDALIE	0.024	0.006094 to 0.04191	Yes	*
Test details	Mean 1	Mean 2	Mean Diff.	SE of diff.	n1	n2	q	DF
Ctrl hIgG vs. N297A	0.03667	0.066	-0.02933	0.007542	3	5	5.5	10
Ctrl hIgG vs. GASDALIE	0.03667	0.042	-0.005333	0.007542	3	5	1	10
N297A vs. GASDALIE	0.066	0.042	0.024	0.006532	5	5	5.196	10
Ctrl hIgG	N297A	GASDALIE
0.04	0.08	0.04
0.03	0.07	0.04
0.04	0.05	0.05
	0.05	0.04
	0.08	0.04
