# Supplementary material for: Distinct impact of IgG subclass on autoantibody pathogenicity in different IgG4-mediated diseases
Source: eLife. 2022 Aug 3;11:e76223. doi: 10.7554/eLife.76223 (PMC9385207; doi:10.7554/eLife.76223)
Supplement: Figure 5—source data 4. [file elife-76223-fig5-data4.xlsx]

## Sheet: Sheet1
Figure 5D
Tukey's multiple comparisons test	Mean Diff.	95% CI of diff.	Significant?	Summary
Ctrl hIgG vs. N297A	-15.92	-30.60 to -1.249	Yes	*
Ctrl hIgG vs. GASDALIE	-2.927	-17.60 to 11.75	No	ns
N297A vs. GASDALIE	13	0.2886 to 25.71	Yes	*
Test details	Mean 1	Mean 2	Mean Diff.	SE of diff.	n1	n2	q	DF
Ctrl hIgG vs. N297A	0.3933	16.32	-15.92	5.354	3	5	4.207	10
Ctrl hIgG vs. GASDALIE	0.3933	3.32	-2.927	5.354	3	5	0.7731	10
N297A vs. GASDALIE	16.32	3.32	13	4.636	5	5	3.965	10
Ctrl hIgG	N297A	GASDALIE
0.41	23	1.35
0.32	20.1	1.08
0.45	3.52	10.4
	6.37	2.8
	28.6	0.97
