# Supplementary material for: Distinct impact of IgG subclass on autoantibody pathogenicity in different IgG4-mediated diseases
Source: eLife. 2022 Aug 3;11:e76223. doi: 10.7554/eLife.76223 (PMC9385207; doi:10.7554/eLife.76223)
Supplement: Figure 5—source data 5. [file elife-76223-fig5-data5.xlsx]

## Sheet: Sheet1
Figure 5E
Tukey's multiple comparisons test	Mean Diff.	95% CI of diff.	Significant?	Summary
Ctrl hIgG vs. N297A	-15932	-31555 to -309.4	Yes	*
Ctrl hIgG vs. GASDALIE	-981.1	-16604 to 14642	No	ns
N297A vs. GASDALIE	14951	1421 to 28481	Yes	*
Test details	Mean 1	Mean 2	Mean Diff.	SE of diff.	n1	n2	q	DF
Ctrl hIgG vs. N297A	291.3	16223	-15932	5699	3	5	3.954	10
Ctrl hIgG vs. GASDALIE	291.3	1272	-981.1	5699	3	5	0.2435	10
N297A vs. GASDALIE	16223	1272	14951	4935	5	5	4.284	10
Ctrl hIgG	N297A	GASDALIE
367	24894	414
186	18504	419
321	2801	3518
	4456	1534
	30462	477
