# Supplementary material for: Distinct impact of IgG subclass on autoantibody pathogenicity in different IgG4-mediated diseases
Source: eLife. 2022 Aug 3;11:e76223. doi: 10.7554/eLife.76223 (PMC9385207; doi:10.7554/eLife.76223)
Supplement: Figure 5—source data 6. [file elife-76223-fig5-data6.xlsx]

## Sheet: Sheet1
Figure 5F
Tukey's multiple comparisons test	Mean Diff.	95% CI of diff.	Significant?	Summary
Ctrl hIgG vs. N297A	-8.4	-10.59 to -6.207	Yes	****
Ctrl hIgG vs. GASDALIE	-2.2	-4.393 to -0.006964	Yes	*
N297A vs. GASDALIE	6.2	4.301 to 8.099	Yes	****
Test details	Mean 1	Mean 2	Mean Diff.	SE of diff.	n1	n2	q	DF
Ctrl hIgG vs. N297A	0	8.4	-8.4	0.8	3	5	14.85	10
Ctrl hIgG vs. GASDALIE	0	2.2	-2.2	0.8	3	5	3.889	10
N297A vs. GASDALIE	8.4	2.2	6.2	0.6928	5	5	12.66	10
Ctrl hIgG	N297A	GASDALIE
0	7	3
0	8	3
0	7	2
	10	2
	10	1
