# Supplementary material for: Distinct impact of IgG subclass on autoantibody pathogenicity in different IgG4-mediated diseases
Source: eLife. 2022 Aug 3;11:e76223. doi: 10.7554/eLife.76223 (PMC9385207; doi:10.7554/eLife.76223)
Supplement: Figure 6—source data 1. [file elife-76223-fig6-data1.xlsx]

## Sheet: Sheet1
Figure 6A
Tukey's multiple comparisons test	Mean Diff.	95% CI of diff.	Significant?	Summary
Ctrl hIgG vs. N297A	0.9019	0.6931 to 1.111	Yes	****
Ctrl hIgG vs. GASDALIE	1.379	1.170 to 1.587	Yes	****
N297A vs. GASDALIE	0.4766	0.2957 to 0.6575	Yes	****
Test details	Mean 1	Mean 2	Mean Diff.	SE of diff.	n1	n2	q	DF
Ctrl hIgG vs. N297A	2.185	1.283	0.9019	0.07619	3	5	16.74	10
Ctrl hIgG vs. GASDALIE	2.185	0.8067	1.379	0.07619	3	5	25.59	10
N297A vs. GASDALIE	1.283	0.8067	0.4766	0.06599	5	5	10.21	10
Ctrl hIgG	N297A	GASDALIE
2.11665	1.10185	0.834
2.22395	1.2595	0.81585
2.21505	1.2559	0.64135
	1.43775	0.84775
	1.36135	0.89455
