# Supplementary material for: Distinct impact of IgG subclass on autoantibody pathogenicity in different IgG4-mediated diseases
Source: eLife. 2022 Aug 3;11:e76223. doi: 10.7554/eLife.76223 (PMC9385207; doi:10.7554/eLife.76223)
Supplement: Figure 6—source data 2. [file elife-76223-fig6-data2.xlsx]

## Sheet: Sheet1
Figure 6B
Tukey's multiple comparisons test	Mean Diff.	95% CI of diff.	Significant?	Summary
Ctrl hIgG vs. N297A	1.055	0.7612 to 1.349	Yes	****
Ctrl hIgG vs. GASDALIE	1.811	1.517 to 2.105	Yes	****
N297A vs. GASDALIE	0.7555	0.5008 to 1.010	Yes	****
Test details	Mean 1	Mean 2	Mean Diff.	SE of diff.	n1	n2	q	DF
Ctrl hIgG vs. N297A	2.308	1.253	1.055	0.1073	3	5	13.91	10
Ctrl hIgG vs. GASDALIE	2.308	0.4972	1.811	0.1073	3	5	23.87	10
N297A vs. GASDALIE	1.253	0.4972	0.7555	0.09293	5	5	11.5	10
Ctrl hIgG	N297A	GASDALIE
2.26855	1.1753	0.4871
2.349	1.43785	0.4221
2.3067	0.9163	0.51355
	1.2943	0.61545
	1.44	0.448
