# Supplementary material for: Distinct impact of IgG subclass on autoantibody pathogenicity in different IgG4-mediated diseases
Source: eLife. 2022 Aug 3;11:e76223. doi: 10.7554/eLife.76223 (PMC9385207; doi:10.7554/eLife.76223)
Supplement: Figure 6—source data 3. [file elife-76223-fig6-data3.xlsx]

## Sheet: Sheet1
Figure 6C
Tukey's multiple comparisons test	Mean Diff.	95.00% CI of diff.	Significant?	Summary	Adjusted P Value
Ctrl hIgG vs. N297A	0.3152	0.1866 to 0.4437	Yes	****	<0.0001	A-B
Ctrl hIgG vs. GASDALIE	0.2767	0.1481 to 0.4052	Yes	***	0.0003	A-C
N297A vs. GASDALIE	-0.03849	-0.1670 to 0.09005	No	ns	0.7107	B-C
Test details	Mean 1	Mean 2	Mean Diff.	SE of diff.	n1	n2	q	DF
Ctrl hIgG vs. N297A	1.548	1.233	0.3152	0.04818	5	5	9.251	12
Ctrl hIgG vs. GASDALIE	1.548	1.272	0.2767	0.04818	5	5	8.121	12
N297A vs. GASDALIE	1.233	1.272	-0.03849	0.04818	5	5	1.13	12
Ctrl hIgG	N297A	GASDALIE
1.51385	1.14755	1.19575
1.53095	1.2951	1.21325
1.6006	1.2235	1.30955
1.5703	1.3097	1.44255
1.52565	1.18965	1.19685
