# Supplementary material for: Distinct impact of IgG subclass on autoantibody pathogenicity in different IgG4-mediated diseases
Source: eLife. 2022 Aug 3;11:e76223. doi: 10.7554/eLife.76223 (PMC9385207; doi:10.7554/eLife.76223)
Supplement: Figure 6—source data 4. [file elife-76223-fig6-data4.xlsx]

## Sheet: Sheet1
Figure 6D
Sidak's multiple comparisons test	Predicted (LS) mean diff.	95.00% CI of diff.	Significant?	Summary
Ctrl hIgG:nude mice vs. Ctrl hIgG:FcγRα-null	0.01302	-0.4882 to 0.5142	No	ns
Ctrl hIgG:nude mice vs. N297A:nude mice	-2.288	-2.789 to -1.786	Yes	****
Ctrl hIgG:nude mice vs. N297A:FcγRα-null	-2.169	-2.670 to -1.668	Yes	****
Ctrl hIgG:nude mice vs. GASDALIE:nude mice	-0.3033	-0.8045 to 0.1979	No	ns
Ctrl hIgG:nude mice vs. GASDALIE:FcγRα-null	-1.731	-2.232 to -1.230	Yes	****
Ctrl hIgG:FcγRα-null vs. N297A:nude mice	-2.301	-2.735 to -1.866	Yes	****
Ctrl hIgG:FcγRα-null vs. N297A:FcγRα-null	-2.182	-2.616 to -1.748	Yes	****
Ctrl hIgG:FcγRα-null vs. GASDALIE:nude mice	-0.3163	-0.7503 to 0.1177	No	ns
Ctrl hIgG:FcγRα-null vs. GASDALIE:FcγRα-null	-1.744	-2.178 to -1.310	Yes	****
N297A:nude mice vs. N297A:FcγRα-null	0.1185	-0.3155 to 0.5525	No	ns
N297A:nude mice vs. GASDALIE:nude mice	1.984	1.550 to 2.418	Yes	****
N297A:nude mice vs. GASDALIE:FcγRα-null	0.5564	0.1224 to 0.9904	Yes	**
N297A:FcγRα-null vs. GASDALIE:nude mice	1.866	1.432 to 2.300	Yes	****
N297A:FcγRα-null vs. GASDALIE:FcγRα-null	0.4379	0.003863 to 0.8719	Yes	*
GASDALIE:nude mice vs. GASDALIE:FcγRα-null	-1.428	-1.862 to -0.9938	Yes	****
Test details	Predicted (LS) mean 1	Predicted (LS) mean 2	Predicted (LS) mean diff.	SE of diff.	N1	N2	t	DF
Ctrl hIgG:nude mice vs. Ctrl hIgG:FcγRα-null	0.17	0.157	0.01302	0.1528	3	5	0.08523	22
Ctrl hIgG:nude mice vs. N297A:nude mice	0.17	2.458	-2.288	0.1528	3	5	14.97	22
Ctrl hIgG:nude mice vs. N297A:FcγRα-null	0.17	2.339	-2.169	0.1528	3	5	14.2	22
Ctrl hIgG:nude mice vs. GASDALIE:nude mice	0.17	0.4733	-0.3033	0.1528	3	5	1.985	22
Ctrl hIgG:nude mice vs. GASDALIE:FcγRα-null	0.17	1.901	-1.731	0.1528	3	5	11.33	22
Ctrl hIgG:FcγRα-null vs. N297A:nude mice	0.157	2.458	-2.301	0.1323	5	5	17.39	22
Ctrl hIgG:FcγRα-null vs. N297A:FcγRα-null	0.157	2.339	-2.182	0.1323	5	5	16.49	22
Ctrl hIgG:FcγRα-null vs. GASDALIE:nude mice	0.157	0.4733	-0.3163	0.1323	5	5	2.391	22
Ctrl hIgG:FcγRα-null vs. GASDALIE:FcγRα-null	0.157	1.901	-1.744	0.1323	5	5	13.18	22
N297A:nude mice vs. N297A:FcγRα-null	2.458	2.339	0.1185	0.1323	5	5	0.8957	22
N297A:nude mice vs. GASDALIE:nude mice	2.458	0.4733	1.984	0.1323	5	5	15	22
N297A:nude mice vs. GASDALIE:FcγRα-null	2.458	1.901	0.5564	0.1323	5	5	4.206	22
N297A:FcγRα-null vs. GASDALIE:nude mice	2.339	0.4733	1.866	0.1323	5	5	14.1	22
N297A:FcγRα-null vs. GASDALIE:FcγRα-null	2.339	1.901	0.4379	0.1323	5	5	3.31	22
GASDALIE:nude mice vs. GASDALIE:FcγRα-null	0.4733	1.901	-1.428	0.1323	5	5	10.79	22
	nude mice					FcγRα-null
Ctrl hIgG	0.1885	0.14955	0.17195			0.15275	0.15825	0.1477	0.1606	0.1656
N297A	1.98195	2.1869	2.8683	2.7859	2.46445	2.3713	2.36755	2.3875	2.17795	2.39075
GASDALIE	0.82645	0.38815	0.4256	0.389	0.3372	2.2593	1.6564	1.8567	1.8805	1.85265
