# Supplementary material for: Distinct impact of IgG subclass on autoantibody pathogenicity in different IgG4-mediated diseases
Source: eLife. 2022 Aug 3;11:e76223. doi: 10.7554/eLife.76223 (PMC9385207; doi:10.7554/eLife.76223)
Supplement: Figure 6—source data 5. [file elife-76223-fig6-data5.xlsx]

## Sheet: Sheet1
Figure 6E
nude mice
Tukey's multiple comparisons test	Mean Diff.	95.00% CI of diff.	Significant?	Summary
Ctrl hIgG vs. N297A	-2.667	-4.138 to -1.195	Yes	**		A-B
Ctrl hIgG vs. GASDALIE	-0.6	-2.120 to 0.9201	No	ns		A-C
N297A vs. GASDALIE	2.067	0.8063 to 3.327	Yes	**		B-C
Test details	Mean 1	Mean 2	Mean Diff.	SE of diff.	n1	n2	q	DF
Ctrl hIgG vs. N297A	0	2.667	-2.667	0.5449	3	6	6.92	11
Ctrl hIgG vs. GASDALIE	0	0.6	-0.6	0.5628	3	5	1.508	11
N297A vs. GASDALIE	2.667	0.6	2.067	0.4667	6	5	6.263	11
Ctrl hIgG	N297A	GASDALIE
0	3	1
0	3	1
0	1	1
	2	0
	3	0
	4
