# Supplementary material for: Distinct impact of IgG subclass on autoantibody pathogenicity in different IgG4-mediated diseases
Source: eLife. 2022 Aug 3;11:e76223. doi: 10.7554/eLife.76223 (PMC9385207; doi:10.7554/eLife.76223)
Supplement: Figure 6—source data 6. [file elife-76223-fig6-data6.xlsx]

## Sheet: Sheet1
Figure 6E
FcγRα-null
Tukey's multiple comparisons test	Mean Diff.	95.00% CI of diff.	Significant?	Summary
Ctrl hIgG vs. N297A	-2.6	-3.793 to -1.407	Yes	***		A-B
Ctrl hIgG vs. GASDALIE	-2.2	-3.393 to -1.007	Yes	***		A-C
N297A vs. GASDALIE	0.4	-0.7931 to 1.593	No	ns		B-C
Test details	Mean 1	Mean 2	Mean Diff.	SE of diff.	n1	n2	q	DF
Ctrl hIgG vs. N297A	0	2.6	-2.6	0.4472	5	5	8.222	12
Ctrl hIgG vs. GASDALIE	0	2.2	-2.2	0.4472	5	5	6.957	12
N297A vs. GASDALIE	2.6	2.2	0.4	0.4472	5	5	1.265	12
Ctrl hIgG	N297A	GASDALIE
0	4	2
0	2	2
0	3	1
0	2	3
0	2	3
