# Supplementary material for: Distinct impact of IgG subclass on autoantibody pathogenicity in different IgG4-mediated diseases
Source: eLife. 2022 Aug 3;11:e76223. doi: 10.7554/eLife.76223 (PMC9385207; doi:10.7554/eLife.76223)
Supplement: Figure 7—source data 1. [file elife-76223-fig7-data1.xlsx]

## Sheet: Sheet1
Figure 7B
Unpaired t test
P value	0.0005
P value summary	***
Significantly different? (P < 0.05)	Yes
One- or two-tailed P value?	Two-tailed
t, df	t=5.662 df=8
F test to compare variances
F,DFn, Dfd	2.300, 4, 4
P value	0.4397
P value summary	ns
Significantly different? (P < 0.05)	No
Without	With
5	1
6	0
5	0
7	3
7	3
