# Supplementary material for: Distinct impact of IgG subclass on autoantibody pathogenicity in different IgG4-mediated diseases
Source: eLife. 2022 Aug 3;11:e76223. doi: 10.7554/eLife.76223 (PMC9385207; doi:10.7554/eLife.76223)
Supplement: Figure 7—source data 2. [file elife-76223-fig7-data2.xlsx]

## Sheet: Sheet1
Figure 7C
Unpaired t test
P value	0.0111
P value summary	*
Significantly different? (P < 0.05)	Yes
One- or two-tailed P value?	Two-tailed
t, df	t=3.286 df=8
F test to compare variances
F,DFn, Dfd	1.143, 4, 4
P value	0.9001
P value summary	ns
Significantly different? (P < 0.05)	No
Without	With
2	0
3	0
4	1
2	1
2	2
